# Supplementary material for: Integrated analysis of direct and proxy genome wide association studies highlights polygenicity of Alzheimer’s disease outside of the APOE region
Source: PLoS Genet. 2022 Jun 3;18(6):e1010208. doi: 10.1371/journal.pgen.1010208 (PMC9200312; doi:10.1371/journal.pgen.1010208)
Supplement: S4 Table — (XLSX) [file pgen.1010208.s016.xlsx]

## Sheet: S4_Table
Table S4. Genome-wide significant (P < 5 x 10-8) SNP association results for Genomic SEM AD.
SNP	CHR	BP	MAF	Effect_allele	Non_Effect_allele	Beta	SE	P-value
rs17617	1	207653395	0.163022	C	A	0.0525398	0.00811678	9.60834e-11
rs9429945	1	207676768	0.199801	T	C	0.0427126	0.00781059	4.53731e-08
rs4844600	1	207679307	0.188867	A	G	0.0662531	0.00755663	1.82609e-18
rs12037841	1	207684192	0.173956	T	G	0.0736834	0.00775215	2.00235e-21
rs4266886	1	207685786	0.189861	T	C	0.0679483	0.0075543	2.36984e-19
rs4562624	1	207685965	0.173956	A	C	0.0738151	0.00774911	1.64041e-21
rs6656401	1	207692049	0.173956	A	G	0.0743497	0.0077552	9.06165e-22
rs6661489	1	207698044	0.185885	T	C	0.0699462	0.00753799	1.70821e-20
rs7515905	1	207738077	0.181909	T	C	0.0720365	0.00760551	2.75551e-21
rs3886100	1	207739127	0.402584	A	G	0.038284	0.00613895	4.48192e-10
rs1752684	1	207747296	0.178926	A	G	0.0733448	0.00757217	3.45452e-22
rs679515	1	207750568	0.171968	T	C	0.0768284	0.00771211	2.23431e-23
rs2274566	1	207753345	0.402584	C	T	0.0379172	0.00610963	5.42989e-10
rs3818361	1	207784968	0.183897	A	G	0.0730345	0.00751173	2.41217e-22
rs7519119	1	207786152	0.40159	G	A	0.0381109	0.00611038	4.45825e-10
rs7542544	1	207786223	0.40159	C	A	0.0379574	0.00611045	5.23561e-10
rs6701713	1	207786289	0.183897	A	G	0.0730896	0.00751149	2.23778e-22
rs2093761	1	207786542	0.178926	A	G	0.0726135	0.00751498	4.35127e-22
rs2093760	1	207786828	0.183897	A	G	0.0730944	0.00751161	2.22714e-22
rs11576522	1	207789269	0.367793	A	G	0.043237	0.00619944	3.07339e-12
rs12036785	1	207792909	0.367793	C	A	0.043248	0.00619986	3.04483e-12
rs2296160	1	207795320	0.177932	A	G	0.0713643	0.00756843	4.13197e-21
rs61822977	1	207796065	0.366799	G	A	0.0424899	0.00620227	7.34895e-12
rs10863417	1	207796897	0.176938	A	T	0.0718838	0.00757041	2.19452e-21
rs10863420	1	207799874	0.177932	A	C	0.0714081	0.00756964	3.96666e-21
rs1830763	1	207800389	0.178926	C	A	0.071947	0.00754527	1.49342e-21
rs12028134	1	207800409	0.40159	A	T	0.0370664	0.00611314	1.3328e-09
rs1408078	1	207800555	0.178926	T	C	0.0720784	0.00754532	1.26322e-21
rs4844610	1	207802552	0.171968	A	C	0.0746789	0.00768748	2.61912e-22
rs11803956	1	207803021	0.40159	T	C	0.0368928	0.00611358	1.59394e-09
rs12041437	1	207803264	0.40159	C	A	0.0369613	0.00611353	1.48647e-09
rs12034383	1	207803595	0.40159	G	A	0.0369462	0.00611368	1.51087e-09
rs1408077	1	207804141	0.178926	A	C	0.0715102	0.00757118	3.55228e-21
rs6697005	1	207806730	0.178926	G	A	0.0722918	0.00771395	7.14651e-21
rs11803366	1	207806989	0.402584	T	C	0.0381665	0.00620164	7.54327e-10
rs11118328	1	207850539	0.191849	C	T	0.0650142	0.00756397	8.30818e-18
rs7537669	1	207875537	0.0616302	T	C	-0.0727045	0.0117369	5.8455e-10
rs111906619	2	127789085	0.0596421	C	T	-0.0688797	0.0114668	1.89122e-09
rs72843896	2	127793239	0.0596421	T	C	-0.0696992	0.0114455	1.13139e-09
rs72843900	2	127802704	0.0586481	G	T	-0.0697648	0.0114771	1.21241e-09
rs55636820	2	127812256	0.054672	G	A	-0.0760246	0.0117439	9.57147e-11
rs1060743	2	127826533	0.291252	A	G	-0.0479849	0.00657136	2.83271e-13
rs17014873	2	127830219	0.0576541	A	C	-0.0787163	0.0117205	1.86589e-11
rs11682128	2	127839474	0.358847	G	A	-0.0467192	0.00632246	1.47484e-13
rs11690153	2	127839534	0.21173	T	C	-0.0457437	0.00769498	2.77116e-09
rs10194375	2	127839781	0.359841	C	A	-0.0483004	0.00628825	1.57777e-14
rs72846701	2	127840714	0.200795	G	A	-0.0496644	0.00768852	1.05015e-10
rs6754293	2	127840867	0.274354	T	G	-0.0506089	0.00697433	3.97377e-13
rs10200967	2	127841769	0.274354	C	T	-0.0507359	0.00696896	3.33153e-13
rs17014923	2	127841930	0.172962	C	T	0.0521828	0.00797908	6.15388e-11
rs58402148	2	127841945	0.200795	C	T	-0.0499927	0.00766212	6.81556e-11
rs11694743	2	127842607	0.416501	A	G	-0.0416459	0.00613767	1.15844e-11
rs10929006	2	127844161	0.390656	G	A	-0.0575159	0.00608064	3.11344e-21
rs74490912	2	127846321	0.180915	A	C	0.0556952	0.00778304	8.3081e-13
rs35832505	2	127846505	0.136183	T	C	-0.047385	0.00790692	2.06197e-09
rs4663095	2	127846807	0.239563	G	A	-0.0410478	0.00704072	5.54068e-09
rs35589443	2	127847736	0.0258449	A	C	-0.106916	0.0194586	3.91713e-08
rs35114168	2	127847930	0.321074	G	A	-0.0651656	0.00627114	2.71486e-25
rs11887884	2	127848041	0.180915	C	T	0.0561958	0.00794241	1.49005e-12
rs1530047	2	127848936	0.189861	A	C	0.0557453	0.00773282	5.6397e-13
rs28434131	2	127850292	0.134195	A	G	-0.0472893	0.00790753	2.22741e-09
rs76168490	2	127850618	0.189861	C	G	0.0553912	0.007733	7.89518e-13
rs10207708	2	127852056	0.189861	G	A	0.0558486	0.00773484	5.18385e-13
rs11694264	2	127852204	0.240557	G	A	-0.0391463	0.00701109	2.35746e-08
rs56117224	2	127854786	0.239563	G	A	-0.0390165	0.00701174	2.6298e-08
rs34854727	2	127855392	0.134195	C	T	-0.0479807	0.00790791	1.29977e-09
rs56405130	2	127859010	0.185885	G	A	-0.0562558	0.00774423	3.75224e-13
rs10166461	2	127859413	0.186879	G	A	0.0567812	0.00774022	2.20288e-13
rs873270	2	127859418	0.135189	T	C	-0.0475905	0.00790909	1.77472e-09
rs749007	2	127859702	0.240557	C	T	-0.0401772	0.0070133	1.01192e-08
rs749006	2	127859766	0.186879	G	A	0.0565199	0.00774019	2.83255e-13
rs55654668	2	127860880	0.240557	C	T	-0.0402363	0.00701359	9.64181e-09
rs11682186	2	127861446	0.240557	C	T	-0.0407095	0.00703751	7.26682e-09
rs4663096	2	127861766	0.139165	T	A	-0.0495172	0.00783298	2.58821e-10
rs4663097	2	127861906	0.139165	G	C	-0.0491616	0.00783305	3.4701e-10
rs72838215	2	127862054	0.185885	G	A	-0.0569742	0.00774601	1.90512e-13
rs6431219	2	127862133	0.379722	C	T	-0.059917	0.00608386	6.95565e-23
rs744368	2	127862653	0.249503	T	G	-0.0593811	0.00726525	3.00051e-16
rs7583814	2	127863029	0.138171	C	T	-0.0483032	0.00796097	1.29907e-09
rs11554586	2	127864546	0.194831	G	A	-0.0570233	0.00772124	1.52161e-13
rs13032148	2	127865100	0.304175	G	A	-0.0504173	0.00634302	1.88828e-15
rs35860453	2	127866047	0.132207	C	T	-0.0484562	0.0079215	9.53271e-10
rs4494685	2	127867815	0.246521	T	C	-0.0599746	0.00732056	2.55598e-16
rs6743470	2	127868435	0.199801	G	T	0.0548347	0.00758574	4.87796e-13
rs13410629	2	127868733	0.199801	C	T	0.0548805	0.00758576	4.66631e-13
rs13400939	2	127869067	0.199801	G	A	0.0549981	0.00758541	4.15198e-13
rs55646068	2	127869366	0.194831	A	G	-0.0594037	0.00771818	1.39744e-14
rs10182292	2	127869462	0.199801	G	A	0.0547663	0.00756142	4.39311e-13
rs36085158	2	127869982	0.132207	C	T	-0.0489506	0.00794223	7.12277e-10
rs13029812	2	127872622	0.132207	A	G	-0.0491222	0.00796382	6.90868e-10
rs4663098	2	127873035	0.246521	T	C	-0.0596874	0.00731627	3.4013e-16
rs7557280	2	127873161	0.133201	T	A	-0.0477223	0.00794212	1.86941e-09
rs7594230	2	127873568	0.199801	G	A	0.0546389	0.00757803	5.58805e-13
rs12994284	2	127874020	0.133201	T	C	-0.0483927	0.00794012	1.09633e-09
rs12994718	2	127874226	0.133201	T	A	-0.0484044	0.00794017	1.0866e-09
rs34745987	2	127875384	0.133201	C	T	-0.0478613	0.00794037	1.6642e-09
rs3845674	2	127875389	0.246521	T	G	-0.0596156	0.00731596	3.67848e-16
rs10929007	2	127875660	0.246521	A	G	-0.0595582	0.00731597	3.92502e-16
rs71414738	2	127876242	0.133201	C	T	-0.0478476	0.00794036	1.68208e-09
rs4663099	2	127878432	0.246521	C	A	-0.0597945	0.00734256	3.8386e-16
rs4663100	2	127878438	0.246521	C	G	-0.0597945	0.00734256	3.8386e-16
rs10929009	2	127878839	0.246521	T	C	-0.0596376	0.00734106	4.51644e-16
rs11904144	2	127880106	0.249503	C	G	-0.0416272	0.00700854	2.85885e-09
rs6431220	2	127880449	0.276342	A	G	-0.0607376	0.00706962	8.59548e-18
rs7566991	2	127880933	0.199801	T	A	0.0548023	0.00758401	4.97296e-13
rs7601287	2	127881243	0.199801	G	A	0.0546785	0.00772246	1.43687e-12
rs7564197	2	127881368	0.276342	A	G	-0.0610367	0.00707005	5.96912e-18
rs6720234	2	127882015	0.133201	T	A	-0.0477139	0.00794058	1.86823e-09
rs35103166	2	127882182	0.390656	T	C	-0.0557517	0.00623854	4.01128e-19
rs72838226	2	127882342	0.195825	T	C	-0.0577164	0.00771567	7.40895e-14
rs55669136	2	127883286	0.195825	A	G	-0.0577113	0.00771558	7.44108e-14
rs7559175	2	127883899	0.276342	G	A	-0.0605728	0.00706911	1.04697e-17
rs57724183	2	127883905	0.195825	A	C	-0.057736	0.00771575	7.27182e-14
rs7575209	2	127884123	0.199801	A	C	0.05479	0.00758482	5.06136e-13
rs58682665	2	127885247	0.311133	A	G	0.0591268	0.00681053	3.89982e-18
rs1583647	2	127885359	0.195825	A	T	-0.0576555	0.00771555	7.8599e-14
rs55828408	2	127885624	0.195825	T	A	-0.0577981	0.00771544	6.82363e-14
rs719054	2	127885651	0.311133	G	A	0.0598393	0.00681111	1.55609e-18
rs13025717	2	127886158	0.263419	C	T	-0.0605931	0.00660391	4.50138e-20
rs13025765	2	127886233	0.263419	C	T	-0.0605813	0.0066038	4.5701e-20
rs12618593	2	127886371	0.263419	T	C	-0.0605672	0.00660455	4.70715e-20
rs12617835	2	127886416	0.263419	A	C	-0.0605856	0.00660459	4.58991e-20
rs13004848	2	127887560	0.12326	T	C	-0.0535384	0.00821008	6.98142e-11
rs62158731	2	127887750	0.257455	C	T	0.0630031	0.00735243	1.04377e-17
rs11689089	2	127887865	0.194831	T	C	-0.0575985	0.00771501	8.28074e-14
rs12989701	2	127887985	0.12326	C	A	-0.0537774	0.00820674	5.64548e-11
rs11685593	2	127888121	0.193837	C	T	-0.057941	0.00771494	5.90242e-14
rs11680911	2	127888757	0.317097	A	C	-0.0709985	0.00631748	2.64099e-29
rs11678744	2	127888784	0.193837	C	G	-0.0579275	0.00771565	6.01307e-14
rs13009551	2	127889118	0.12326	C	T	-0.054332	0.00821426	3.73172e-11
rs7561528	2	127889637	0.317097	G	A	-0.0703588	0.0063143	7.76712e-29
rs6710467	2	127889932	0.125249	G	A	-0.0547884	0.00816601	1.95533e-11
rs60692476	2	127890253	0.192843	G	T	-0.0583924	0.00777373	5.84541e-14
rs4663104	2	127890786	0.198807	G	C	-0.0566964	0.00774326	2.44255e-13
rs6714558	2	127890878	0.196819	G	C	-0.058113	0.00772028	5.17931e-14
rs60572885	2	127891116	0.190855	T	C	-0.0582661	0.00775954	5.95973e-14
rs56193035	2	127891207	0.193837	C	G	-0.0579415	0.00774992	7.63877e-14
rs61308109	2	127891326	0.193837	G	A	-0.0571273	0.00775186	1.71275e-13
rs57109420	2	127891356	0.193837	G	A	-0.0580607	0.0077521	6.90442e-14
rs4663105	2	127891427	0.403579	A	C	-0.0905825	0.00621217	3.68564e-48
rs59253801	2	127891511	0.193837	G	A	-0.058899	0.00784618	6.06341e-14
rs59176034	2	127891623	0.193837	C	T	-0.0584421	0.00775066	4.68969e-14
rs72838284	2	127891663	0.193837	T	C	-0.0584565	0.0077508	4.62835e-14
rs72838285	2	127891795	0.193837	A	G	-0.0583783	0.00774958	4.9551e-14
rs34779859	2	127892768	0.32505	G	T	-0.0678137	0.00666401	2.53483e-24
rs6733839	2	127892810	0.379722	C	T	-0.0972382	0.00634298	4.81537e-53
rs72838287	2	127892956	0.193837	C	G	-0.0598054	0.00783312	2.25931e-14
rs745717	2	127893897	0.0666004	G	C	-0.0943328	0.010698	1.16767e-18
rs56368748	2	127894098	0.32008	G	A	-0.0730927	0.00678206	4.40325e-27
rs730482	2	127894484	0.272366	A	T	-0.076348	0.00661623	8.34058e-31
rs744373	2	127894615	0.272366	A	G	-0.0761781	0.00661243	1.0408e-30
rs893434	2	127894757	0.196819	G	A	-0.0592575	0.00794895	9.00307e-14
rs893432	2	127894851	0.22664	T	C	-0.0495623	0.00751334	4.20759e-11
rs6431223	2	127895487	0.294235	G	A	0.04772	0.00752959	2.33275e-10
rs6605277	2	233978212	0.189861	A	C	0.0467802	0.00833999	2.03339e-08
rs10933431	2	233981912	0.228628	G	C	-0.0475411	0.00775669	8.84099e-10
rs4504245	4	11014822	0.217694	A	G	0.0439496	0.00739165	2.75032e-09
rs4373155	4	11022799	0.264414	T	G	-0.0398743	0.00677152	3.89657e-09
rs11728636	4	11023243	0.260437	G	A	-0.0402244	0.00679864	3.288e-09
rs10939105	4	11023682	0.282306	A	G	0.0409389	0.00667621	8.67531e-10
rs6448450	4	11024168	0.27833	A	G	0.0407702	0.00670229	1.17939e-09
rs6448451	4	11024682	0.27833	G	C	0.0404682	0.00670177	1.55613e-09
rs6846529	4	11025131	0.282306	C	T	0.0404017	0.00669903	1.6297e-09
rs6448453	4	11026028	0.27833	A	G	0.0408424	0.00670001	1.08848e-09
rs4351014	4	11027619	0.282306	T	C	0.0413951	0.00667859	5.71228e-10
rs4635810	4	11027704	0.282306	T	C	0.0403465	0.00670318	1.75492e-09
rs4613558	4	11027769	0.282306	A	G	0.0406329	0.00670273	1.34318e-09
rs4622992	4	11027814	0.27833	T	C	0.0402245	0.00670509	1.98409e-09
rs1506790	4	11033136	0.279324	A	G	0.0401574	0.00670545	2.11436e-09
rs1876266	4	11037414	0.280318	G	C	0.0406251	0.00672849	1.56263e-09
rs1001158	4	11038456	0.280318	G	A	0.0408888	0.00670388	1.06557e-09
rs2904297	4	11040290	0.284294	C	T	0.0401052	0.00670452	2.20669e-09
rs10015233	4	11040406	0.280318	G	C	0.0399454	0.00670661	2.58285e-09
rs9268081	6	32234412	0.333996	G	A	0.0356526	0.00651727	4.4882e-08
rs6928678	6	32238280	0.33499	G	A	0.0361358	0.00651736	2.94721e-08
rs9268112	6	32247990	0.335984	A	G	0.0369932	0.00652313	1.41898e-08
rs2395141	6	32282068	0.333996	G	A	0.0357401	0.00651735	4.16184e-08
rs543928	6	32285248	0.39165	G	A	0.0348412	0.00630347	3.25198e-08
rs6457541	6	32285348	0.340954	G	C	0.0356705	0.00648817	3.84612e-08
rs9268230	6	32287567	0.333996	G	A	0.0362172	0.00651786	2.75057e-08
rs4348357	6	32291359	0.333996	T	G	0.0358354	0.00652665	4.00499e-08
rs742697	6	32291542	0.333996	C	T	0.0356608	0.00651739	4.459e-08
rs3132957	6	32292956	0.333996	T	C	0.0356711	0.00651738	4.41911e-08
rs2077002	6	32293532	0.333002	T	C	0.0358363	0.00651785	3.83743e-08
rs1265762	6	32321115	0.471173	C	A	0.0348532	0.00619148	1.81027e-08
rs1265760	6	32321872	0.471173	T	C	0.034818	0.00619086	1.8648e-08
rs1265759	6	32322393	0.471173	C	T	0.0347279	0.00619087	2.02875e-08
rs6904608	6	32327727	0.471173	C	T	0.0347552	0.00619085	1.97751e-08
rs6904636	6	32327781	0.471173	C	T	0.0347667	0.00619086	1.95646e-08
rs3129910	6	32328296	0.471173	T	C	0.034791	0.00619085	1.91236e-08
rs3129911	6	32328403	0.471173	C	T	0.0346318	0.00619089	2.21907e-08
rs7775978	6	32328895	0.471173	G	A	0.0347049	0.00621329	2.32918e-08
rs7763071	6	32329644	0.471173	C	T	0.034799	0.00619084	1.89811e-08
rs3129918	6	32332790	0.471173	C	A	0.0347722	0.00619084	1.94626e-08
rs3129921	6	32333093	0.471173	A	G	0.0348361	0.00619083	1.83325e-08
rs3129922	6	32333098	0.471173	C	T	0.0348361	0.00619083	1.83325e-08
rs3129923	6	32333195	0.471173	A	G	0.0347372	0.00619087	2.01126e-08
rs2273017	6	32337630	0.431412	G	A	0.0367505	0.00623165	3.69285e-09
rs1980496	6	32340070	0.346918	C	T	0.0364311	0.00651652	2.26315e-08
rs9268433	6	32345891	0.199801	T	G	0.0448973	0.00752931	2.47652e-09
rs9268451	6	32349086	0.199801	T	C	0.0448959	0.00752929	2.47903e-09
rs9268455	6	32349772	0.199801	C	T	0.0449277	0.00752927	2.41542e-09
rs3793127	6	32371915	0.199801	C	T	0.0448911	0.00752787	2.47158e-09
rs3763309	6	32375973	0.199801	C	A	0.0450574	0.0075297	2.17781e-09
rs3763312	6	32376348	0.198807	G	A	0.0447781	0.00753121	2.75327e-09
rs9268521	6	32381374	0.204771	G	C	0.0419471	0.00748292	2.07394e-08
rs9268522	6	32381443	0.204771	A	T	0.0419424	0.007485	2.10041e-08
rs4959098	6	32383256	0.394632	A	C	0.0404753	0.00630985	1.41175e-10
rs4335021	6	32386619	0.394632	T	C	0.0412647	0.00632793	6.98225e-11
rs2395163	6	32387809	0.197813	T	C	0.0430131	0.00759741	1.50012e-08
rs2395166	6	32388275	0.394632	C	T	0.0404807	0.00630682	1.37574e-10
rs3135344	6	32395036	0.314115	C	T	0.0394759	0.00670229	3.86405e-09
rs9268581	6	32396930	0.199801	G	A	0.0415266	0.0075537	3.85159e-08
rs9268614	6	32402778	0.201789	T	G	0.0418431	0.00757382	3.30033e-08
rs9268627	6	32405821	0.200795	T	C	0.041978	0.00757431	2.98771e-08
rs9268926	6	32433067	0.180915	A	G	0.048215	0.00784377	7.90053e-10
rs9269084	6	32441199	0.4334	A	G	0.0360665	0.00646045	2.36859e-08
rs79973795	6	32505443	0.399602	A	G	0.0395034	0.00719025	3.92892e-08
rs115124923	6	32510482	0.199801	C	A	0.04626	0.00803886	8.68709e-09
rs3828840	6	32520907	0.298211	T	C	0.0421948	0.0072604	6.18662e-09
rs35882239	6	32522576	0.297217	A	G	0.0407394	0.00728038	2.19638e-08
rs72845730	6	32526731	0.33002	A	C	0.040914	0.00717472	1.18043e-08
rs115879259	6	32559213	0.121272	A	T	0.0569783	0.00953425	2.28439e-09
rs9270505	6	32559216	0.43837	A	G	0.0362256	0.00656071	3.35943e-08
rs9270522	6	32559541	0.286282	T	A	0.0397548	0.00718206	3.10697e-08
rs9270539	6	32559764	0.281312	T	C	0.0403894	0.00720335	2.05837e-08
rs34855541	6	32559825	0.16501	A	G	0.0548003	0.00840281	6.95291e-11
rs36096565	6	32560025	0.181909	A	G	0.0572347	0.00859281	2.72397e-11
rs35395738	6	32560209	0.17992	T	C	0.0551061	0.00837803	4.78599e-11
rs28366284	6	32560327	0.328032	C	T	0.0400883	0.00711358	1.74591e-08
rs34291045	6	32560385	0.172962	A	T	0.0508306	0.00917367	3.00889e-08
rs34415150	6	32560477	0.140159	A	G	0.0544534	0.0086194	2.65758e-10
rs35118762	6	32560631	0.159046	C	T	0.0521046	0.00836392	4.67371e-10
rs34928543	6	32560695	0.147117	G	C	0.0526799	0.00843944	4.31721e-10
rs35074855	6	32561140	0.135189	C	G	0.0534501	0.0095202	1.97261e-08
rs9270584	6	32561277	0.26839	C	T	0.0399721	0.00716514	2.42343e-08
rs9270587	6	32561305	0.269384	T	G	0.0402861	0.00716285	1.86248e-08
rs35265698	6	32561334	0.159046	C	G	0.0511532	0.00828879	6.76981e-10
rs34350244	6	32561465	0.15507	C	T	0.0540195	0.00857553	2.99055e-10
rs35294087	6	32561466	0.15507	A	G	0.0528858	0.0085644	6.61357e-10
rs34553045	6	32561565	0.143141	T	C	0.054564	0.00866496	3.03295e-10
rs35371668	6	32561638	0.142147	C	T	0.0520836	0.00847696	8.03986e-10
rs9270599	6	32561656	0.423459	G	A	0.0427084	0.00652925	6.10748e-11
rs34647096	6	32561681	0.146123	G	A	0.0529539	0.00832802	2.03699e-10
rs9270622	6	32565329	0.267396	C	T	0.0396666	0.00712541	2.59281e-08
rs9270624	6	32565413	0.2833	G	C	0.0388503	0.0071051	4.55279e-08
rs9270650	6	32565854	0.266402	C	T	0.039513	0.00710492	2.67681e-08
rs687308	6	32567256	0.156064	C	T	0.0538303	0.00832773	1.01988e-10
rs35117964	6	32568146	0.151093	A	G	0.052328	0.00852261	8.25683e-10
rs9270805	6	32569556	0.269384	T	A	0.0413948	0.00698014	3.02256e-09
rs9270809	6	32569608	0.265408	G	A	0.0412717	0.0069802	3.36583e-09
rs9270813	6	32569790	0.265408	C	T	0.0415088	0.00700149	3.05572e-09
rs9270816	6	32569879	0.265408	T	G	0.0418196	0.00700138	2.32845e-09
rs9270817	6	32569911	0.265408	A	G	0.0418217	0.00700138	2.32444e-09
rs9270824	6	32570055	0.276342	T	G	0.0403355	0.00688086	4.57363e-09
rs34039593	6	32570311	0.158052	T	G	0.0525804	0.00821562	1.55324e-10
rs9270836	6	32570325	0.275348	A	G	0.0417661	0.00700098	2.43505e-09
rs9270839	6	32570375	0.281312	A	C	0.0420847	0.00700215	1.85228e-09
rs9270842	6	32570461	0.272366	C	T	0.0419721	0.00700143	2.03751e-09
rs9270844	6	32570550	0.27833	T	G	0.0418477	0.00700133	2.27123e-09
rs9270845	6	32570571	0.279324	T	C	0.0409531	0.006989	4.63847e-09
rs9270847	6	32570602	0.279324	G	T	0.0411873	0.00698783	3.76646e-09
rs9270848	6	32570609	0.279324	C	T	0.0414854	0.00698811	2.91041e-09
rs9270850	6	32570717	0.27833	G	A	0.0419205	0.00700152	2.133e-09
rs9270852	6	32570797	0.271372	G	A	0.0420318	0.00696856	1.62304e-09
rs9270856	6	32570839	0.266402	A	G	0.0416975	0.00696857	2.18189e-09
rs9270859	6	32570894	0.265408	T	C	0.0420895	0.00700188	1.84189e-09
rs9270865	6	32571011	0.289264	G	C	0.0421753	0.00697994	1.51879e-09
rs9270866	6	32571043	0.2833	G	A	0.041773	0.0070014	2.42578e-09
rs2647066	6	32571122	0.167992	C	T	0.0520666	0.00817426	1.89539e-10
rs9270874	6	32571227	0.270378	G	A	0.0420385	0.00700147	1.92223e-09
rs17425622	6	32571961	0.12326	T	C	0.0536774	0.00847472	2.39163e-10
rs9270902	6	32571962	0.305169	A	G	0.0407034	0.0069824	5.56168e-09
rs9270907	6	32572082	0.332008	C	T	0.0404736	0.00696639	6.25335e-09
rs9270908	6	32572148	0.276342	G	A	0.0420621	0.00700091	1.87722e-09
rs9270921	6	32572326	0.292247	C	T	0.0407748	0.00696069	4.68868e-09
rs9270922	6	32572388	0.286282	T	C	0.0418878	0.00700071	2.18575e-09
rs9270931	6	32572547	0.27336	A	T	0.041904	0.00700095	2.15772e-09
rs9270934	6	32572695	0.269384	G	C	0.0421086	0.00700094	1.80214e-09
rs9270935	6	32572701	0.269384	A	G	0.0421007	0.00700095	1.81477e-09
rs9270937	6	32572757	0.269384	A	G	0.042137	0.00700088	1.7569e-09
rs9270949	6	32572975	0.286282	T	C	0.0444618	0.00687716	1.0121e-10
rs601945	6	32573415	0.156064	A	G	0.0540549	0.0083376	8.97544e-11
rs602457	6	32573562	0.163022	T	C	0.0533821	0.00865853	7.0363e-10
rs9270970	6	32573574	0.270378	C	T	0.040752	0.00696046	4.77646e-09
rs9270971	6	32573598	0.267396	T	C	0.0410357	0.00695825	3.69234e-09
rs9270977	6	32573748	0.270378	A	G	0.0414442	0.00695817	2.5819e-09
rs9270979	6	32573780	0.269384	A	G	0.0412688	0.0069582	3.0117e-09
rs9270985	6	32574027	0.265408	T	C	0.0410706	0.0069585	3.58633e-09
rs9270988	6	32574130	0.265408	A	G	0.0411676	0.00695849	3.29534e-09
rs2760994	6	32574308	0.405567	C	T	0.039421	0.00631041	4.18488e-10
rs9270999	6	32574438	0.267396	G	A	0.0414369	0.00695847	2.60254e-09
rs9271006	6	32574602	0.287276	T	C	0.0392302	0.00698592	1.95875e-08
rs9271013	6	32574703	0.2833	G	C	0.0419544	0.00699076	1.95617e-09
rs7760841	6	32574868	0.115308	C	T	0.0562976	0.00925306	1.1707e-09
rs9271066	6	32575631	0.267396	A	G	0.0414402	0.00698185	2.9309e-09
rs9271068	6	32575674	0.267396	C	G	0.0417816	0.00697975	2.1492e-09
rs9271073	6	32575803	0.265408	G	T	0.041708	0.0069801	2.29704e-09
rs9271076	6	32575873	0.265408	G	A	0.0416349	0.00700172	2.74137e-09
rs9271078	6	32575930	0.265408	C	T	0.0415714	0.00700145	2.89332e-09
rs9271089	6	32576177	0.270378	T	G	0.0413256	0.00698048	3.21626e-09
rs9271090	6	32576247	0.265408	T	C	0.0413619	0.00698048	3.11595e-09
rs9271092	6	32576296	0.26839	A	G	0.041536	0.00698045	2.67602e-09
rs9271096	6	32576426	0.274354	A	G	0.0394594	0.00694608	1.3406e-08
rs9271100	6	32576478	0.265408	T	C	0.0408149	0.00698146	5.0297e-09
rs9271101	6	32576493	0.271372	C	T	0.0410926	0.00698138	3.95597e-09
rs9271108	6	32576633	0.280318	G	A	0.0412829	0.00697995	3.32905e-09
rs9271109	6	32576687	0.265408	T	C	0.0419438	0.00693965	1.50258e-09
rs9271117	6	32576795	0.333996	C	T	0.0413083	0.00695773	2.9021e-09
rs9271144	6	32577220	0.270378	G	A	0.0408628	0.00698033	4.79911e-09
rs9271145	6	32577224	0.270378	C	G	0.0411523	0.0069803	3.73585e-09
rs9271146	6	32577282	0.262425	A	C	0.041343	0.00703937	4.27704e-09
rs660895	6	32577380	0.217694	A	G	0.0455418	0.00763096	2.40128e-09
rs9271162	6	32577715	0.265408	G	T	0.041366	0.00697997	3.09673e-09
rs9271163	6	32577733	0.266402	C	T	0.0413618	0.00697998	3.10818e-09
rs9271164	6	32577784	0.266402	C	T	0.0402945	0.00695865	7.01538e-09
rs9271165	6	32577785	0.266402	A	G	0.0402958	0.00695881	7.01298e-09
rs9271170	6	32577889	0.269384	T	C	0.0412556	0.00697995	3.40885e-09
rs532965	6	32577973	0.156064	T	G	0.0514567	0.00812726	2.42995e-10
rs9271172	6	32577975	0.266402	C	T	0.0413451	0.00698026	3.15844e-09
rs9271173	6	32577981	0.266402	A	G	0.0413451	0.00698026	3.15845e-09
rs9271174	6	32578040	0.265408	C	G	0.0413161	0.00697997	3.23454e-09
rs9271178	6	32578191	0.267396	C	T	0.0413111	0.00698013	3.2513e-09
rs9271182	6	32578230	0.266402	A	G	0.0416599	0.00697401	2.32081e-09
rs9271192	6	32578530	0.265408	C	A	0.0413544	0.0069803	3.13358e-09
rs9271193	6	32578566	0.264414	T	C	0.0413488	0.00698028	3.14872e-09
rs9271194	6	32578612	0.264414	T	G	0.0413449	0.0069803	3.15953e-09
rs9271198	6	32578726	0.265408	G	A	0.0413282	0.00698016	3.20354e-09
rs9271200	6	32578756	0.265408	C	T	0.041358	0.00698016	3.12151e-09
rs9271201	6	32578818	0.265408	C	A	0.0412431	0.00698016	3.45012e-09
rs9271202	6	32578837	0.265408	A	C	0.0412428	0.00698017	3.4511e-09
rs9271205	6	32578941	0.271372	G	A	0.0410541	0.00698017	4.06479e-09
rs9271242	6	32579940	0.266402	T	C	0.041572	0.00697993	2.58576e-09
rs9271246	6	32580084	0.266402	A	G	0.0417314	0.00697979	2.24671e-09
rs9271247	6	32580112	0.266402	A	G	0.041743	0.00697975	2.22334e-09
rs9271252	6	32580288	0.267396	C	G	0.0417256	0.00697972	2.25727e-09
rs9271255	6	32580357	0.267396	C	T	0.0417266	0.00697971	2.25517e-09
rs3997871	6	32580456	0.267396	G	A	0.0408092	0.00700163	5.59204e-09
rs9271260	6	32580507	0.267396	A	C	0.0416837	0.00697987	2.34363e-09
rs3997872	6	32580617	0.15507	T	A	0.0533684	0.00834932	1.63788e-10
rs2395516	6	32580657	0.313121	T	C	0.038156	0.00677493	1.78194e-08
rs3997874	6	32580741	0.265408	A	G	0.04125	0.00700122	3.81942e-09
rs521539	6	32581973	0.217694	G	A	0.0468234	0.00773706	1.43207e-09
rs3129751	6	32582189	0.15507	A	C	0.0533474	0.0083497	1.66826e-10
rs3104413	6	32582650	0.15507	C	G	0.0521383	0.00830063	3.3588e-10
rs6605556	6	32583099	0.154076	A	G	0.0550402	0.00839728	5.5819e-11
rs6931277	6	32583357	0.157058	A	T	0.0530122	0.00830708	1.7529e-10
rs6941972	6	32583529	0.215706	G	A	0.0521341	0.00836368	4.5642e-10
rs1846190	6	32583813	0.267396	G	A	0.0384096	0.00697732	3.69317e-08
rs510205	6	32584693	0.215706	C	G	0.0499132	0.00788936	2.50542e-10
rs3129761	6	32585504	0.452286	G	C	0.0380745	0.00633446	1.84723e-09
rs3104412	6	32585967	0.455268	A	G	0.0383088	0.0063449	1.56303e-09
rs9271364	6	32586787	0.482107	A	G	0.0362357	0.00630458	9.05579e-09
rs9271365	6	32586794	0.387674	T	G	0.0382028	0.00638597	2.20021e-09
rs9271375	6	32587067	0.44334	G	A	0.0406788	0.00633003	1.30725e-10
rs9271414	6	32587782	0.383698	C	T	0.03839	0.00661933	6.64416e-09
rs9271483	6	32588882	0.385686	G	T	0.0379726	0.00661812	9.59844e-09
rs9271493	6	32589158	0.382704	A	G	0.0380747	0.00661673	8.69963e-09
rs9271514	6	32589613	0.383698	A	G	0.0387111	0.00661665	4.8993e-09
rs9271515	6	32589645	0.383698	A	G	0.038535	0.00661666	5.74772e-09
rs9271548	6	32590234	0.383698	A	T	0.0381411	0.00661693	8.20639e-09
rs9271608	6	32591588	0.159046	A	G	0.0541675	0.00839279	1.089e-10
rs3104375	6	32600101	0.159046	G	C	0.0546534	0.00844143	9.51734e-11
rs1391371	6	32603798	0.177932	A	T	0.0462129	0.00819203	1.68867e-08
rs9272417	6	32605078	0.157058	A	G	0.0542602	0.00833322	7.44997e-11
rs9272426	6	32605189	0.419483	A	G	0.0358268	0.00653832	4.26493e-08
rs9272461	6	32605609	0.168986	G	A	0.0462141	0.00825154	2.13535e-08
rs41269945	6	32607853	0.153082	A	T	0.0472741	0.00861175	4.03099e-08
rs17426593	6	32608077	0.16004	T	C	0.0477236	0.00854291	2.31899e-08
rs34141382	6	32608478	0.135189	T	C	0.0509776	0.00879434	6.76588e-09
rs34763586	6	32608998	0.158052	T	C	0.0493438	0.00855968	8.18164e-09
rs34965214	6	32609545	0.166998	C	T	0.0490066	0.00843475	6.24403e-09
rs9272785	6	32610401	0.167992	G	A	0.0489103	0.00850337	8.82585e-09
rs114430970	6	32614158	0.110338	G	A	0.0551082	0.0099718	3.26866e-08
rs9273404	6	32627160	0.460239	A	G	0.0386048	0.00658695	4.60614e-09
rs9273531	6	32628712	0.0974155	C	T	0.0672254	0.011009	1.01913e-09
rs6908032	6	32643739	0.191849	G	A	-0.0499736	0.00900407	2.85488e-08
rs28755304	6	32646193	0.319085	C	T	0.0406198	0.00732833	2.97608e-08
rs9275092	6	32648987	0.104374	C	T	0.0696533	0.0105417	3.9119e-11
rs9275095	6	32649088	0.104374	C	G	0.0698098	0.0105274	3.32894e-11
rs9275097	6	32649126	0.10338	A	G	0.0699956	0.010521	2.87297e-11
rs9275098	6	32649161	0.10338	C	T	0.0702735	0.0105209	2.39929e-11
rs9275152	6	32652196	0.106362	T	C	0.0712356	0.0110563	1.17163e-10
rs9275167	6	32653263	0.105368	A	G	0.0687042	0.0104367	4.61214e-11
rs9275183	6	32654502	0.164016	A	G	0.0603486	0.00945845	1.76643e-10
rs9275184	6	32654714	0.106362	T	C	0.0688415	0.0103216	2.56457e-11
rs9275203	6	32656947	0.104374	G	A	0.0691811	0.010414	3.0723e-11
rs9275207	6	32657710	0.104374	A	G	0.0686022	0.010414	4.47285e-11
rs9275213	6	32658335	0.104374	T	C	0.0686928	0.0104142	4.22141e-11
rs9275214	6	32658665	0.104374	G	A	0.0688913	0.0104374	4.10054e-11
rs9275221	6	32659099	0.104374	T	C	0.068084	0.0103991	5.86617e-11
rs9275223	6	32659839	0.104374	G	A	0.0687534	0.0104388	4.5076e-11
rs9275275	6	32662607	0.104374	G	A	0.0683902	0.0103749	4.34205e-11
rs9275293	6	32663308	0.104374	T	C	0.0684168	0.0103748	4.26722e-11
rs9275296	6	32663431	0.104374	T	C	0.0683981	0.0103746	4.31411e-11
rs9275300	6	32664126	0.104374	A	G	0.0684254	0.0103968	4.66172e-11
rs9275307	6	32664990	0.104374	A	T	0.0682251	0.0103755	4.84592e-11
rs9275310	6	32665319	0.104374	T	G	0.0682829	0.0103753	4.66432e-11
rs9275311	6	32665640	0.104374	G	T	0.0682667	0.0103747	4.70114e-11
rs9275312	6	32665728	0.171968	A	G	0.0562128	0.00927635	1.36292e-09
rs9275313	6	32665759	0.104374	G	T	0.0669107	0.0102879	7.83108e-11
rs9275314	6	32665909	0.104374	C	A	0.0680596	0.0104087	6.20601e-11
rs9275315	6	32665912	0.104374	C	A	0.0680624	0.0104088	6.19569e-11
rs9275318	6	32666173	0.163022	A	G	0.0599587	0.00943739	2.10729e-10
rs9275319	6	32666295	0.163022	A	G	0.0599305	0.00943862	2.16023e-10
rs9275324	6	32666635	0.104374	C	T	0.0688912	0.0104046	3.5625e-11
rs9275325	6	32666651	0.104374	G	T	0.0689787	0.0104045	3.36371e-11
rs9275326	6	32666660	0.104374	C	T	0.0689927	0.0104083	3.38831e-11
rs9275327	6	32666802	0.171968	C	T	0.0567105	0.00931684	1.15134e-09
rs9275328	6	32666822	0.172962	C	T	0.0566058	0.00931684	1.23489e-09
rs9275330	6	32666875	0.171968	A	G	0.0565978	0.00933773	1.35114e-09
rs9275331	6	32666899	0.172962	A	G	0.0565389	0.00931524	1.28303e-09
rs9275333	6	32666968	0.171968	T	C	0.0565989	0.00929288	1.12511e-09
rs9275334	6	32667107	0.104374	T	C	0.0686131	0.0103976	4.14094e-11
rs9275338	6	32667343	0.171968	A	T	0.0550831	0.00929076	3.05141e-09
rs9275356	6	32667850	0.105368	C	G	0.0686338	0.0104145	4.3909e-11
rs9275358	6	32667895	0.172962	C	G	0.0569605	0.00935079	1.11844e-09
rs9275360	6	32667937	0.170974	A	T	0.0579136	0.00950681	1.11649e-09
rs9275362	6	32667957	0.170974	C	T	0.0576654	0.00951569	1.36098e-09
rs9275365	6	32668125	0.171968	G	A	0.0562533	0.00928585	1.3786e-09
rs9275373	6	32668411	0.111332	G	A	0.0581719	0.00991467	4.43056e-09
rs9275382	6	32668831	0.114314	T	C	0.0652126	0.0103116	2.54558e-10
rs9275383	6	32668846	0.11332	G	T	0.0638119	0.0102402	4.61931e-10
rs9275387	6	32669013	0.104374	T	C	0.0677651	0.010371	6.4011e-11
rs9275394	6	32669454	0.104374	A	C	0.0681478	0.0104147	6.01297e-11
rs9275395	6	32669483	0.104374	A	G	0.0678377	0.0103716	6.12109e-11
rs9275400	6	32669761	0.104374	C	G	0.0677654	0.010371	6.39932e-11
rs9275422	6	32670548	0.104374	G	A	0.0677485	0.0103714	6.47876e-11
rs9275426	6	32670912	0.104374	T	C	0.0676608	0.0103734	6.91215e-11
rs9275429	6	32671057	0.104374	G	A	0.0676593	0.0103723	6.889e-11
rs9275430	6	32671086	0.104374	C	T	0.0676574	0.010372	6.8874e-11
rs9275434	6	32671247	0.104374	C	T	0.0675746	0.0103721	7.26552e-11
rs9275435	6	32671332	0.104374	G	C	0.0676032	0.0103721	7.13387e-11
rs9275437	6	32671412	0.104374	C	T	0.0676845	0.0103725	6.78373e-11
rs9275442	6	32671755	0.104374	G	A	0.0676839	0.0103721	6.77394e-11
rs9275476	6	32672624	0.104374	T	C	0.067285	0.0104212	1.07107e-10
rs9275477	6	32672641	0.104374	A	C	0.0672928	0.0104316	1.1121e-10
rs9275486	6	32673099	0.104374	T	A	0.0688995	0.0105021	5.36068e-11
rs9275495	6	32673574	0.104374	A	T	0.0687216	0.01049	5.71056e-11
rs9275503	6	32673931	0.104374	A	G	0.0669868	0.0104745	1.60299e-10
rs9275530	6	32675523	0.104374	G	C	0.067389	0.010371	8.15064e-11
rs9275532	6	32675634	0.104374	C	G	0.0674099	0.0103658	7.86924e-11
rs9275541	6	32676159	0.104374	C	G	0.0673705	0.0103712	8.25422e-11
rs4273728	6	32678491	0.104374	T	C	0.0679138	0.0104366	7.65386e-11
rs9275583	6	32680299	0.104374	G	A	0.0670416	0.0103942	1.11916e-10
rs9275592	6	32680620	0.10338	G	T	0.0674477	0.0103942	8.64137e-11
rs3957146	6	32681530	0.10338	T	C	0.0676634	0.0103969	7.61473e-11
rs3998159	6	32682019	0.102386	A	C	0.0673887	0.0103757	8.31048e-11
rs3957148	6	32682137	0.10338	A	G	0.0656971	0.0103679	2.34911e-10
rs9275599	6	32682429	0.0984095	C	T	0.0644508	0.0113944	1.54631e-08
rs3873448	6	32683055	0.116302	C	T	0.0576312	0.010092	1.12601e-08
rs3873453	6	32683382	0.124254	C	T	0.0555816	0.00989311	1.92945e-08
rs9275611	6	32683763	0.115308	G	A	0.0568877	0.009989	1.23348e-08
rs9275614	6	32684257	0.116302	A	G	0.0569988	0.00996308	1.05899e-08
rs9275615	6	32684272	0.116302	T	A	0.0567695	0.0100481	1.60664e-08
rs9275618	6	32684387	0.116302	A	G	0.0563056	0.00994129	1.48041e-08
rs3916765	6	32685550	0.116302	G	A	0.0544367	0.00992212	4.10222e-08
rs114812713	6	41034000	0.027833	G	C	-0.126446	0.0183013	4.87651e-12
rs1931833	6	47427281	0.254473	T	A	-0.0416158	0.00668625	4.84358e-10
rs7740963	6	47427611	0.255467	C	T	-0.0414338	0.00668683	5.77932e-10
rs9381562	6	47429767	0.255467	C	A	-0.0417662	0.00668859	4.25473e-10
rs9473117	6	47431284	0.255467	A	C	-0.0414262	0.00668617	5.799e-10
rs9381563	6	47432637	0.322068	C	T	0.0417825	0.00623708	2.09767e-11
rs9369693	6	47433751	0.254473	A	C	-0.0410414	0.00668737	8.40109e-10
rs9369695	6	47440565	0.252485	C	A	-0.0426935	0.00668196	1.66574e-10
rs4715018	6	47441871	0.252485	T	C	-0.0426758	0.0066806	1.68057e-10
rs1931837	6	47442377	0.252485	C	T	-0.0426505	0.00667997	1.71582e-10
rs9381564	6	47443806	0.252485	A	G	-0.042651	0.00667799	1.69386e-10
rs1004173	6	47445017	0.252485	C	T	-0.042617	0.0066761	1.73075e-10
rs4715019	6	47447041	0.251491	T	A	-0.0423224	0.00667598	2.30521e-10
rs9367279	6	47448336	0.251491	A	G	-0.0423388	0.00667508	2.25592e-10
rs9473119	6	47450618	0.251491	G	A	-0.0423114	0.00667435	2.30642e-10
rs9296558	6	47451883	0.251491	C	T	-0.0423407	0.00667391	2.23558e-10
rs9296559	6	47452270	0.251491	T	C	-0.0422858	0.00667474	2.37043e-10
rs9349407	6	47453378	0.251491	G	C	-0.0422266	0.00667409	2.50071e-10
rs4711878	6	47456118	0.255467	A	G	-0.0421184	0.00664896	2.37978e-10
rs6931478	6	47461913	0.255467	C	A	-0.0420097	0.00667309	3.0664e-10
rs9349409	6	47463126	0.255467	G	T	-0.0419146	0.00667259	3.35078e-10
rs9395262	6	47465267	0.255467	T	C	-0.0420181	0.00664882	2.62181e-10
rs7738044	6	47469273	0.255467	A	G	-0.04195	0.00664882	2.80137e-10
rs9473122	6	47474962	0.255467	C	T	-0.041952	0.00669629	3.72926e-10
rs9473123	6	47475339	0.255467	G	A	-0.0421024	0.00664893	2.41675e-10
rs9463335	6	47479136	0.244533	G	A	-0.0406526	0.00670906	1.36667e-09
rs4711880	6	47480676	0.251491	A	G	-0.0420716	0.00667456	2.91429e-10
rs1872505	6	47480975	0.255467	C	G	-0.0421407	0.00664915	2.33126e-10
rs9473126	6	47481833	0.251491	C	G	-0.0424585	0.00667473	2.00343e-10
rs4715025	6	47483653	0.251491	C	G	-0.0423677	0.00667435	2.18369e-10
rs7749271	6	47485002	0.255467	T	C	-0.0423728	0.00664897	1.85557e-10
rs7767350	6	47485126	0.251491	C	T	-0.0424136	0.00667421	2.08619e-10
rs10948363	6	47487762	0.251491	A	G	-0.0423009	0.00667482	2.33705e-10
rs9296561	6	47488938	0.255467	G	A	-0.0423776	0.00664926	1.85036e-10
rs6913202	6	47489104	0.251491	A	G	-0.0424261	0.0066743	2.0623e-10
rs13201473	6	47489708	0.251491	G	A	-0.0420907	0.00669797	3.29771e-10
rs7749167	6	47493940	0.255467	G	A	-0.0420269	0.00664908	2.60362e-10
rs9296564	6	47494759	0.255467	A	G	-0.0425256	0.00665024	1.60964e-10
rs7754282	6	47502024	0.255467	G	C	-0.0423935	0.00664915	1.82043e-10
rs6904764	6	47503497	0.255467	A	T	-0.0423105	0.00664918	1.97499e-10
rs9473128	6	47505010	0.255467	C	T	-0.0423709	0.00664917	1.86146e-10
rs9349413	6	47511491	0.244533	A	G	-0.040698	0.00670986	1.31622e-09
rs901186	6	47514246	0.255467	T	A	-0.0424081	0.00664901	1.79281e-10
rs7774667	6	47514758	0.255467	G	A	-0.0424093	0.00664903	1.79103e-10
rs2151974	6	47515630	0.256461	G	A	-0.0421624	0.00664831	2.27076e-10
rs2151975	6	47515663	0.255467	T	C	-0.0423956	0.00664918	1.81703e-10
rs2171089	6	47515811	0.251491	A	G	-0.042539	0.00667429	1.84691e-10
rs9367284	6	47516369	0.255467	A	G	-0.0424137	0.00664901	1.78311e-10
rs6931011	6	47525202	0.256461	G	A	-0.04215	0.00664734	2.28445e-10
rs9381575	6	47528764	0.255467	C	G	-0.0423972	0.00664907	1.81271e-10
rs34744382	6	47536444	0.255467	C	T	-0.0424446	0.00669699	2.32986e-10
rs12193051	6	47541415	0.255467	C	G	-0.0425827	0.00664964	1.51599e-10
rs9395279	6	47542864	0.255467	C	T	-0.0426035	0.00664969	1.48568e-10
rs9357546	6	47549495	0.255467	C	T	-0.0425332	0.00664968	1.59217e-10
rs9395283	6	47551444	0.255467	T	C	-0.042514	0.00664963	1.622e-10
rs9349415	6	47551861	0.255467	T	C	-0.042484	0.00664965	1.67071e-10
rs9349416	6	47551938	0.255467	G	A	-0.0425175	0.00664966	1.61677e-10
rs9369716	6	47552180	0.251491	A	T	-0.0427056	0.00667495	1.5754e-10
rs13193054	6	47552817	0.255467	C	A	-0.0421202	0.00669713	3.18902e-10
rs9296567	6	47553402	0.244533	G	A	-0.0409925	0.00668559	8.70702e-10
rs9395285	6	47554177	0.244533	G	A	-0.0411006	0.00668572	7.8703e-10
rs9369717	6	47554468	0.244533	T	G	-0.0410906	0.00668547	7.93364e-10
rs1485780	6	47556630	0.255467	A	C	-0.04262	0.00664984	1.46311e-10
rs9381578	6	47556634	0.255467	C	T	-0.04262	0.00664984	1.46311e-10
rs9381579	6	47556680	0.255467	C	T	-0.0426164	0.00664986	1.46844e-10
rs10456570	6	47559451	0.255467	A	G	-0.0426169	0.00664977	1.46691e-10
rs6903331	6	47562915	0.255467	A	G	-0.0428731	0.00664938	1.13579e-10
rs2396825	6	47568696	0.255467	A	G	-0.0428178	0.00664949	1.20056e-10
rs9395286	6	47575332	0.255467	T	C	-0.0427502	0.00664962	1.28474e-10
rs13212790	6	47576367	0.255467	T	C	-0.0425032	0.00664965	1.63946e-10
rs9349417	6	47580657	0.255467	A	G	-0.042565	0.00667424	1.79998e-10
rs9381581	6	47580695	0.255467	G	A	-0.0424062	0.00667421	2.10134e-10
rs12195738	6	47583664	0.244533	C	T	-0.0426373	0.0066861	1.80572e-10
rs9463342	6	47585106	0.255467	A	T	-0.0424074	0.00665033	1.809e-10
rs10948367	6	47585615	0.255467	A	G	-0.0424499	0.00665031	1.73482e-10
rs1948047	6	47585912	0.255467	T	C	-0.0424841	0.00665187	1.69406e-10
rs2171086	6	47590104	0.256461	C	T	-0.0420415	0.00667423	2.99413e-10
rs7754971	6	47590476	0.255467	C	T	-0.0424128	0.00667449	2.09161e-10
rs1385742	6	47595155	0.324056	A	T	0.0441088	0.00646784	9.12298e-12
rs9395288	6	47598125	0.227634	C	T	-0.042972	0.00703877	1.02776e-09
rs55796551	7	99777422	0.241551	G	A	0.0407804	0.00716963	1.28578e-08
rs12666107	7	99778019	0.241551	G	C	0.0403334	0.00714605	1.65991e-08
rs866500	7	99840461	0.235586	A	G	-0.042383	0.00716595	3.32891e-09
rs858502	7	99843353	0.49006	T	C	-0.0343716	0.00605321	1.3609e-08
rs34857299	7	99874197	0.219682	T	A	0.046665	0.00746648	4.10622e-10
rs6979218	7	99893148	0.250497	C	G	-0.0426435	0.00712537	2.16724e-09
rs7384878	7	99932049	0.326044	C	T	-0.0478751	0.00668345	7.88033e-13
rs35305377	7	99938955	0.445328	G	A	-0.034465	0.00614644	2.05496e-08
rs34893607	7	99946207	0.163022	G	A	-0.045018	0.00814151	3.2124e-08
rs13246354	7	99950006	0.162028	C	T	-0.0446583	0.00816516	4.51633e-08
rs2405442	7	99971313	0.321074	T	C	-0.0471265	0.00659684	9.07824e-13
rs1859788	7	99971834	0.321074	A	G	-0.0472081	0.00659036	7.88137e-13
rs2906657	7	99984089	0.332008	T	C	0.0430394	0.00662044	7.97978e-11
rs34995835	7	99990364	0.297217	T	G	-0.047605	0.00666134	8.90475e-13
rs1476679	7	100004446	0.299205	C	T	-0.0471171	0.00666087	1.50835e-12
rs34919929	7	100012334	0.305169	G	A	-0.0476365	0.00661285	5.86333e-13
rs60738304	7	100012579	0.305169	A	C	-0.0483824	0.00663575	3.0729e-13
rs5015755	7	100013402	0.161034	G	T	-0.0444395	0.0081041	4.1678e-08
rs5015756	7	100013457	0.432406	T	C	-0.0334059	0.00609666	4.26825e-08
rs3807475	7	100026292	0.162028	G	A	-0.0445853	0.00812811	4.12726e-08
rs55773945	7	100042413	0.442346	T	C	-0.034442	0.00613343	1.9604e-08
rs4727455	7	100070680	0.163022	G	A	-0.0463545	0.00818617	1.49151e-08
rs6971558	7	100079857	0.308151	A	T	-0.0461524	0.00660292	2.75476e-12
rs35146386	7	100089739	0.161034	G	A	-0.0459145	0.00820035	2.15482e-08
rs12539172	7	100091795	0.307157	T	C	-0.0452831	0.00654747	4.64212e-12
rs7791765	7	143099107	0.222664	T	G	0.0478946	0.00757469	2.56574e-10
rs10808026	7	143099133	0.222664	C	A	0.0479415	0.00757443	2.46132e-10
rs56402156	7	143103481	0.218688	G	A	0.0486255	0.00756568	1.30041e-10
rs3935067	7	143104331	0.333996	G	C	-0.036341	0.00631256	8.56564e-09
rs12703526	7	143107588	0.478131	G	T	-0.0352147	0.00611492	8.47056e-09
rs11762262	7	143107876	0.217694	C	T	0.0480089	0.00755726	2.11587e-10
rs7810606	7	143108158	0.478131	T	C	-0.0349807	0.00611558	1.06564e-08
rs11763230	7	143108841	0.218688	C	T	0.0473237	0.00752215	3.14919e-10
rs11767557	7	143109139	0.217694	T	C	0.0477998	0.00752094	2.07661e-10
rs75045569	7	143109208	0.175944	T	G	0.0493529	0.00802483	7.74706e-10
rs12540656	7	143117919	0.432406	G	A	0.0368206	0.00620666	2.98468e-09
rs10265814	7	143121621	0.476143	C	G	0.0352783	0.00617342	1.09993e-08
rs10226151	7	143122457	0.476143	A	G	0.033786	0.00612837	3.52682e-08
rs7805776	7	143124296	0.476143	G	A	0.0338478	0.00612751	3.31537e-08
rs35575787	8	27187520	0.0884692	G	T	0.0601165	0.0110188	4.87541e-08
rs36057699	8	27188819	0.0884692	C	A	0.0608952	0.0110028	3.1212e-08
rs28834970	8	27195121	0.343936	T	C	-0.0463593	0.00632834	2.37722e-13
rs6987305	8	27208126	0.34493	G	A	-0.0457829	0.00630406	3.8015e-13
rs2322599	8	27211910	0.346918	G	A	-0.0459537	0.00630387	3.10532e-13
rs73223431	8	27219987	0.345924	C	T	-0.0473473	0.00632937	7.39991e-14
rs17057043	8	27220310	0.346918	G	A	-0.0463349	0.00630567	2.00989e-13
rs755951	8	27226790	0.38668	A	C	-0.0442029	0.0062008	1.01403e-12
rs112754919	8	27227453	0.307157	C	T	-0.037756	0.00652847	7.32581e-09
rs17057051	8	27227554	0.306163	A	G	-0.0388002	0.00653016	2.821e-09
rs7013346	8	27228666	0.307157	C	A	-0.0379158	0.00652875	6.34087e-09
rs17447007	8	27230637	0.33002	A	G	-0.0380052	0.0064232	3.28132e-09
rs12679874	8	27230819	0.336978	A	G	-0.0364411	0.00638994	1.17796e-08
rs6557994	8	27232018	0.314115	T	C	-0.0365622	0.00649396	1.80015e-08
rs13265352	8	27248546	0.0874751	C	T	0.0627336	0.0108769	8.0424e-09
rs71519635	8	27268168	0.0854871	T	C	0.0622328	0.0109457	1.30379e-08
rs79145239	8	27319847	0.104374	A	T	0.0622411	0.0102704	1.35932e-09
rs34181358	8	27322974	0.101392	G	A	0.0628669	0.0102862	9.85367e-10
rs2741342	8	27330096	0.23161	C	T	0.0465745	0.00734923	2.33767e-10
rs71519637	8	27334098	0.0914513	C	T	0.0622533	0.0105441	3.54568e-09
rs35505579	8	27337045	0.0914513	A	T	0.0625584	0.0105448	2.98136e-09
rs34476881	8	27350981	0.0765408	T	C	0.0604353	0.0109719	3.62557e-08
rs35889509	8	27395098	0.0815109	A	G	0.0612348	0.0108196	1.51718e-08
rs7341557	8	27402777	0.0934394	G	A	0.0584938	0.0101315	7.76499e-09
rs1316801	8	27429228	0.425447	C	T	-0.0362354	0.00615273	3.87781e-09
rs7831810	8	27430506	0.447316	A	G	-0.0367727	0.00611056	1.76691e-09
rs10780145	8	27434722	0.425447	C	T	-0.0363473	0.00615176	3.45378e-09
rs4732728	8	27441521	0.419483	C	G	-0.0376339	0.00614843	9.30539e-10
rs6983452	8	27448028	0.434394	C	T	-0.0368105	0.00618579	2.66791e-09
rs2279590	8	27456253	0.404573	T	C	-0.0591252	0.00631364	7.62811e-21
rs4732729	8	27461492	0.352883	C	A	-0.0444978	0.0065877	1.43141e-11
rs7982	8	27462481	0.385686	A	G	-0.0596087	0.00629223	2.7093e-21
rs9331908	8	27463618	0.350895	C	T	-0.0445382	0.00658921	1.38688e-11
rs11136000	8	27464519	0.387674	T	C	-0.0594422	0.00628851	3.30818e-21
rs4236673	8	27464929	0.387674	A	G	-0.0599412	0.00629074	1.59586e-21
rs11787077	8	27465312	0.389662	T	C	-0.0598007	0.00628835	1.9109e-21
rs1532276	8	27466157	0.388668	T	C	-0.0602772	0.00631102	1.28343e-21
rs1532277	8	27466181	0.387674	T	C	-0.0602131	0.00631319	1.46083e-21
rs1532278	8	27466315	0.385686	T	C	-0.0599938	0.00631795	2.18564e-21
rs9331896	8	27467686	0.395626	C	T	-0.059931	0.00635971	4.36154e-21
rs2070926	8	27467821	0.393638	C	G	-0.059619	0.00636398	7.37769e-21
rs867230	8	27468503	0.40159	C	A	-0.06175	0.00641403	6.12994e-22
rs536332	8	27475767	0.44831	G	A	-0.0347712	0.00614699	1.54378e-08
rs538181	8	27476815	0.45328	G	A	-0.0337963	0.00611437	3.25088e-08
rs484377	8	27477509	0.45825	C	T	-0.0333952	0.00609197	4.20921e-08
rs485902	8	27489959	0.45328	G	C	0.0334197	0.00612702	4.91169e-08
rs74347557	10	11714507	0.338966	C	T	-0.0370776	0.00638021	6.19735e-09
rs77892763	10	11714686	0.33996	C	T	-0.0369382	0.00638019	7.05878e-09
rs11257238	10	11717397	0.353877	T	C	-0.039664	0.0063089	3.23672e-10
rs2011704	10	11718331	0.354871	T	C	-0.0397062	0.00630899	3.10221e-10
rs7912495	10	11718713	0.454274	A	G	-0.0380411	0.00611684	5.00096e-10
rs11257240	10	11719074	0.354871	T	G	-0.0397696	0.00630929	2.91294e-10
rs7920721	10	11720308	0.367793	A	G	-0.0412597	0.00624701	3.98292e-11
rs113111379	10	11720620	0.348907	C	T	-0.0380471	0.00631604	1.70284e-09
rs12416487	10	11721057	0.348907	A	T	-0.0365059	0.00641557	1.26888e-08
rs12358692	10	11721102	0.348907	C	T	-0.0360554	0.00641483	1.90257e-08
rs11257242	10	11721119	0.348907	C	G	-0.0362231	0.00641568	1.64204e-08
rs7068614	10	11721477	0.264414	A	T	-0.0398858	0.00682511	5.09665e-09
rs7078398	10	11723537	0.270378	A	T	-0.0383103	0.0068797	2.56789e-08
rs11039165	11	47312689	0.26839	A	G	-0.0373447	0.00667905	2.2535e-08
rs67871383	11	47335838	0.321074	T	C	0.035328	0.00644539	4.22606e-08
rs11039183	11	47346940	0.365805	G	A	-0.0357092	0.00622761	9.8078e-09
rs2856653	11	47361084	0.365805	T	C	0.0371362	0.00626631	3.09784e-09
rs2596407	11	47361838	0.366799	A	G	0.0374909	0.00629163	2.54017e-09
rs2697923	11	47363215	0.364811	G	T	0.0374441	0.00629613	2.72829e-09
rs10838696	11	47363285	0.361829	G	A	-0.0370325	0.0062965	4.06691e-09
rs3824869	11	47378245	0.355865	T	C	0.0367031	0.00627914	5.05841e-09
rs3740688	11	47380340	0.457256	G	T	-0.0394539	0.00604597	6.77027e-11
rs7105851	11	47383275	0.326044	T	C	-0.0349534	0.00639771	4.67027e-08
rs11039203	11	47384597	0.322068	A	G	0.0353929	0.0064025	3.2395e-08
rs67116452	11	47385194	0.322068	G	A	0.0353849	0.00640217	3.25722e-08
rs10838698	11	47385923	0.326044	G	A	-0.035146	0.0063956	3.89947e-08
rs10838699	11	47386073	0.326044	T	C	-0.0351505	0.00639564	3.88488e-08
rs935914	11	47387599	0.331014	C	T	-0.0353729	0.00639162	3.12558e-08
rs12801188	11	47388214	0.347913	G	A	-0.0371511	0.00627244	3.16293e-09
rs35996350	11	47389223	0.326044	A	G	0.0355154	0.00639797	2.83962e-08
rs34937994	11	47389638	0.356859	C	T	-0.0366138	0.00624839	4.63686e-09
rs4752827	11	47389676	0.33002	C	G	-0.0350318	0.00639439	4.28896e-08
rs4752987	11	47390692	0.33002	A	G	-0.035626	0.00636964	2.23068e-08
rs10769258	11	47391039	0.33002	C	T	-0.0353184	0.00636977	2.94475e-08
rs67472071	11	47391745	0.327038	G	A	0.0363483	0.00640047	1.3548e-08
rs7928163	11	47391879	0.33002	G	A	-0.0353262	0.00639388	3.29497e-08
rs10437655	11	47391948	0.378728	G	A	-0.0375719	0.00617051	1.13656e-09
rs11039212	11	47393303	0.326044	A	T	0.0361315	0.00639913	1.63924e-08
rs4992357	11	47393638	0.33002	T	C	-0.0353298	0.00639507	3.30347e-08
rs896817	11	47394305	0.377734	C	T	-0.0374748	0.00617057	1.25423e-09
rs896816	11	47394338	0.33002	T	C	-0.0356017	0.00639551	2.59659e-08
rs7940536	11	47395240	0.33002	G	A	-0.0356072	0.00639561	2.58504e-08
rs55677087	11	47397714	0.326044	C	G	0.0361796	0.00640063	1.58124e-08
rs2278890	11	47399602	0.349901	G	A	-0.0363844	0.00624897	5.79864e-09
rs3758675	11	47400602	0.349901	G	A	-0.0361692	0.00624898	7.12251e-09
rs11601173	11	47401058	0.326044	A	G	0.0352848	0.00640199	3.55723e-08
rs11607981	11	47401060	0.326044	T	G	0.0353284	0.00640332	3.4445e-08
rs11601603	11	47401171	0.326044	A	C	0.0354884	0.00640023	2.94174e-08
rs11606287	11	47407439	0.350895	C	A	-0.0353437	0.0062225	1.34712e-08
rs35032070	11	47408592	0.350895	G	A	-0.0353409	0.00622202	1.34719e-08
rs11500477	11	47409051	0.357853	T	A	-0.0366806	0.00617201	2.79762e-09
rs6485753	11	47410200	0.328032	C	T	-0.0351552	0.00639655	3.88582e-08
rs4752990	11	47410393	0.32505	G	A	0.0351624	0.00640255	3.97543e-08
rs10838702	11	47410888	0.375746	G	T	-0.0362674	0.00612013	3.10553e-09
rs4752993	11	47410951	0.328032	T	C	-0.0350553	0.00639651	4.24394e-08
rs4752994	11	47411065	0.329026	A	T	-0.0350854	0.0063965	4.13244e-08
rs10769262	11	47411581	0.329026	G	A	-0.0350569	0.00639649	4.23772e-08
rs12803525	11	47413475	0.32505	G	A	0.0352473	0.00642563	4.12474e-08
rs11605672	11	47413733	0.32505	A	G	0.0350066	0.00640159	4.54045e-08
rs55876153	11	47416636	0.32505	G	A	0.0354916	0.006425	3.31394e-08
rs1377416	11	47416746	0.37674	C	T	-0.0355101	0.00611763	6.45392e-09
rs10769263	11	47417183	0.37674	A	C	-0.0354355	0.00611777	6.94604e-09
rs58965622	11	47418465	0.32505	C	G	0.0349764	0.00640202	4.67288e-08
rs1534576	11	47419663	0.373757	G	T	-0.0349999	0.00611841	1.06258e-08
rs1317164	11	47419757	0.327038	G	T	0.0350893	0.00640171	4.22379e-08
rs10769264	11	47423340	0.373757	C	T	-0.0345288	0.00611909	1.67317e-08
rs11039219	11	47424400	0.327038	C	T	0.0350064	0.00640076	4.52316e-08
rs10838705	11	47424931	0.374751	G	A	-0.0346412	0.00611777	1.49284e-08
rs11039221	11	47427739	0.372763	C	T	-0.0346715	0.00611883	1.45866e-08
rs4752999	11	47428565	0.328032	C	T	0.0349971	0.00640098	4.56549e-08
rs7947450	11	47429904	0.373757	G	A	-0.0346995	0.00611747	1.40973e-08
rs11039225	11	47430599	0.372763	G	A	-0.0346496	0.00611744	1.47822e-08
rs755554	11	47432034	0.333002	G	C	-0.0351794	0.00642249	4.31293e-08
rs10742802	11	47432725	0.371769	T	G	-0.0346832	0.006118	1.43602e-08
rs2293579	11	47440758	0.369781	G	A	-0.034631	0.00611465	1.48224e-08
rs10838709	11	47447346	0.371769	C	T	-0.0345874	0.00611599	1.55627e-08
rs12292911	11	47449072	0.371769	G	A	-0.0346533	0.00611601	1.46163e-08
rs4434960	11	47454551	0.373757	A	T	-0.0343435	0.00611631	1.96491e-08
rs7103648	11	47461783	0.373757	A	G	-0.0344905	0.00611652	1.71128e-08
rs7104036	11	47462140	0.373757	A	G	-0.0344762	0.00611656	1.73503e-08
rs1286289	11	59826677	0.302187	T	A	0.0422723	0.00652956	9.54487e-11
rs1286171	11	59831458	0.27336	A	G	0.045111	0.00666145	1.27054e-11
rs1151065	11	59831716	0.272366	C	A	0.0450773	0.00666275	1.32789e-11
rs1286170	11	59831930	0.337972	G	A	0.0366712	0.00637937	9.00861e-09
rs1286169	11	59832346	0.272366	T	G	0.0450441	0.0066619	1.36606e-11
rs501697	11	59833123	0.271372	T	A	0.0450058	0.00666209	1.42341e-11
rs579721	11	59834318	0.271372	G	A	0.0453922	0.00666338	9.61223e-12
rs1296390	11	59834821	0.271372	G	A	0.0451424	0.00666327	1.24563e-11
rs3016834	11	59835242	0.271372	C	T	0.0445715	0.00668748	2.64812e-11
rs3016835	11	59835456	0.271372	C	T	0.045415	0.00668726	1.11149e-11
rs1151103	11	59836391	0.271372	T	A	0.0454633	0.0066655	9.06059e-12
rs528823	11	59837097	0.272366	C	T	0.0453079	0.00666267	1.04429e-11
rs474951	11	59838621	0.272366	T	G	0.0448643	0.00666211	1.64775e-11
rs536531	11	59839361	0.271372	C	T	0.0454677	0.00666494	8.98358e-12
rs539360	11	59839682	0.271372	C	A	0.0453961	0.00666339	9.57434e-12
rs525828	11	59844015	0.271372	A	T	0.0456585	0.00666544	7.38306e-12
rs501945	11	59844242	0.271372	G	C	0.0458227	0.00666573	6.22679e-12
rs471457	11	59845231	0.272366	G	A	0.0454508	0.00666589	9.2054e-12
rs543695	11	59845829	0.308151	C	A	0.0413365	0.00650009	2.02577e-10
rs549680	11	59846494	0.271372	A	G	0.0463565	0.00666782	3.59457e-12
rs549651	11	59846504	0.271372	G	C	0.0458613	0.00666637	6.00618e-12
rs1151104	11	59847805	0.271372	T	A	0.0458443	0.00666663	6.12622e-12
rs1151105	11	59848232	0.308151	C	T	0.0411686	0.00650041	2.4007e-10
rs1286162	11	59848317	0.271372	T	G	0.0458517	0.00666677	6.08516e-12
rs558788	11	59852078	0.270378	T	G	0.046682	0.00670073	3.24458e-12
rs558678	11	59852113	0.270378	T	G	0.0467449	0.00672635	3.66532e-12
rs554311	11	59852569	0.271372	C	T	0.047619	0.00674912	1.71878e-12
rs573790	11	59855385	0.355865	T	C	0.044541	0.00638894	3.13426e-12
rs1441586	11	59856028	0.456262	T	C	0.0434124	0.00608357	9.60843e-13
rs2583476	11	59857581	0.423459	G	A	0.0484243	0.00612076	2.54334e-15
rs2847663	11	59858036	0.424453	C	G	0.0487704	0.00611863	1.57645e-15
rs2847664	11	59858497	0.422465	G	A	0.0486973	0.00611891	1.74152e-15
rs556917	11	59858712	0.461233	A	T	0.0444521	0.00605472	2.10853e-13
rs2847666	11	59859576	0.417495	A	G	0.0498769	0.00612594	3.89024e-16
rs2847667	11	59859609	0.417495	C	T	0.0497982	0.00612608	4.33275e-16
rs502581	11	59860178	0.460239	G	T	0.0443527	0.00605526	2.39513e-13
rs2583471	11	59861814	0.425447	G	A	0.0488076	0.00609563	1.17557e-15
rs2070970	11	59861983	0.425447	C	T	0.048814	0.00609558	1.16503e-15
rs2847668	11	59862261	0.425447	A	T	0.0488432	0.00611949	1.44466e-15
rs1290426	11	59864279	0.328032	C	G	0.039729	0.00635509	4.06476e-10
rs2847655	11	59865671	0.419483	T	C	0.0496704	0.0061276	5.23034e-16
rs502419	11	59866175	0.463221	G	A	0.0439753	0.00605605	3.83144e-13
rs2855017	11	59866309	0.425447	C	T	0.0485295	0.00609635	1.71454e-15
rs17528859	11	59867379	0.425447	T	C	0.0486546	0.00609644	1.45359e-15
rs574704	11	59867913	0.463221	A	G	0.0443486	0.00605584	2.41974e-13
rs580817	11	59869090	0.463221	A	G	0.0443779	0.00605592	2.33565e-13
rs580064	11	59869119	0.492048	T	C	0.0412141	0.00603794	8.74e-12
rs521952	11	59870196	0.463221	A	C	0.0448383	0.00607943	1.63841e-13
rs516478	11	59870788	0.463221	G	A	0.0444868	0.00605581	2.04029e-13
rs487997	11	59871604	0.463221	T	C	0.0443803	0.00605635	2.33803e-13
rs485333	11	59871862	0.329026	C	G	0.0400435	0.00635478	2.95134e-10
rs1813217	11	59872498	0.425447	G	C	0.0488993	0.00609625	1.04705e-15
rs1786137	11	59873448	0.463221	T	C	0.0448331	0.0060795	1.65004e-13
rs512495	11	59876036	0.463221	A	G	0.0443083	0.00605585	2.54316e-13
rs555635	11	59877143	0.463221	A	C	0.0442152	0.0060559	2.8527e-13
rs11230147	11	59877394	0.426441	C	T	0.0487361	0.00609623	1.30131e-15
rs514266	11	59877697	0.459245	T	C	0.0446241	0.00605584	1.72206e-13
rs562028	11	59877850	0.329026	A	C	0.0393092	0.00633245	5.38066e-10
rs4939311	11	59877967	0.422465	C	T	0.0489163	0.00612002	1.31868e-15
rs563803	11	59878001	0.459245	G	A	0.0445772	0.0060559	1.8259e-13
rs540170	11	59880038	0.459245	C	T	0.0445096	0.00605625	1.99151e-13
rs574695	11	59881524	0.459245	G	C	0.0444379	0.00605573	2.16543e-13
rs574798	11	59881561	0.459245	A	G	0.0444865	0.00605574	2.03965e-13
rs581133	11	59882306	0.460239	A	G	0.0445449	0.00605562	1.89558e-13
rs1303615	11	59885120	0.459245	C	T	0.0453332	0.00607914	8.83984e-14
rs1125357	11	59885493	0.421471	A	C	0.0495362	0.00612049	5.79704e-16
rs564912	11	59885888	0.459245	A	T	0.044633	0.0060792	2.10551e-13
rs1303621	11	59890674	0.459245	T	C	0.0450086	0.00607932	1.32589e-13
rs11230153	11	59896901	0.419483	G	T	0.0492378	0.00612565	9.13368e-16
rs483629	11	59899911	0.45825	C	T	0.0452741	0.00608237	9.80497e-14
rs4939312	11	59900106	0.420477	C	T	0.0494058	0.00612409	7.17763e-16
rs4939314	11	59900575	0.421471	T	C	0.0496672	0.00612404	5.05322e-16
rs474123	11	59901422	0.393638	C	A	0.0451923	0.00612454	1.5961e-13
rs61901691	11	59902799	0.413519	C	T	0.050616	0.00613204	1.52726e-16
rs525794	11	59903287	0.45825	A	G	0.045293	0.00608178	9.5245e-14
rs55847558	11	59903793	0.420477	C	G	0.0493473	0.00612413	7.76529e-16
rs11230155	11	59904959	0.421471	C	T	0.049769	0.00612397	4.40346e-16
rs504272	11	59906476	0.45825	T	C	0.0452101	0.00608227	1.06093e-13
rs2165525	11	59906792	0.420477	A	C	0.0498009	0.00612396	4.21794e-16
rs7124974	11	59906972	0.413519	G	T	0.0506598	0.00613196	1.4374e-16
rs510518	11	59907097	0.45825	A	G	0.0451889	0.00608226	1.08905e-13
rs534273	11	59907399	0.45825	A	G	0.045237	0.00608227	1.02593e-13
rs1786140	11	59908627	0.393638	T	C	0.0458399	0.00617031	1.09327e-13
rs493692	11	59909610	0.45825	A	G	0.0453748	0.00608221	8.63592e-14
rs1863472	11	59909647	0.419483	C	G	0.0497083	0.00612415	4.78753e-16
rs569046	11	59911161	0.460239	C	G	0.0454786	0.00608213	7.58009e-14
rs476722	11	59913806	0.459245	T	C	0.0454147	0.00608245	8.23533e-14
rs595481	11	59914267	0.459245	T	C	0.0454183	0.00608247	8.1994e-14
rs583296	11	59914726	0.459245	T	C	0.0452318	0.00608253	1.03514e-13
rs558375	11	59915129	0.459245	C	T	0.0456271	0.00608371	6.38711e-14
rs1316005	11	59916087	0.459245	A	G	0.0462554	0.00608483	2.92146e-14
rs1315491	11	59916253	0.459245	A	T	0.0463991	0.00628914	1.61108e-13
rs617916	11	59916749	0.459245	A	G	0.0466499	0.00608405	1.75273e-14
rs606588	11	59916905	0.459245	G	T	0.0464635	0.00608433	2.23067e-14
rs688030	11	59918162	0.459245	C	A	0.0467023	0.00608393	1.6369e-14
rs684961	11	59918837	0.459245	G	A	0.0468056	0.0060842	1.43758e-14
rs11230160	11	59919165	0.422465	C	T	0.0509608	0.00612537	8.82456e-17
rs11230161	11	59920231	0.421471	C	A	0.0509612	0.00612577	8.86036e-17
rs10897009	11	59923194	0.422465	G	A	0.0510039	0.00612518	8.29741e-17
rs983392	11	59923508	0.414513	A	G	0.05168	0.00615731	4.7282e-17
rs652354	11	59923991	0.459245	C	T	0.046735	0.00608384	1.5683e-14
rs11600716	11	59924422	0.422465	G	C	0.0511006	0.00612566	7.30109e-17
rs920573	11	59924959	0.422465	G	A	0.0509571	0.00612522	8.85345e-17
rs107903	11	59926256	0.45825	C	T	0.0468582	0.00608377	1.33779e-14
rs17529983	11	59927039	0.420477	G	A	0.0505938	0.00612566	1.46518e-16
rs602396	11	59927484	0.454274	T	A	0.0460599	0.00608408	3.71625e-14
rs11605427	11	59928672	0.399602	G	C	0.0528648	0.00613891	7.21538e-18
rs664034	11	59930966	0.392644	C	T	0.0444355	0.00613484	4.38406e-13
rs7926954	11	59932579	0.400596	G	A	0.0531771	0.00613816	4.58052e-18
rs56189574	11	59933492	0.430417	A	G	0.0484032	0.00606254	1.41683e-15
rs617135	11	59936757	0.466203	A	G	0.0436397	0.00602632	4.43664e-13
rs7933202	11	59936926	0.393638	A	C	0.053963	0.00617044	2.22209e-18
rs667897	11	59936979	0.465209	A	G	0.043571	0.00602641	4.82954e-13
rs610932	11	59939307	0.436382	T	G	-0.0476806	0.00607201	4.0775e-15
rs7232	11	59940599	0.360835	T	A	0.0475722	0.00639329	9.99659e-14
rs634475	11	59942081	0.442346	G	A	-0.0481811	0.00606304	1.91561e-15
rs662196	11	59942757	0.442346	C	T	-0.0483049	0.0060629	1.62184e-15
rs7935829	11	59942815	0.404573	A	G	0.0536275	0.00613403	2.27771e-18
rs2278867	11	59943109	0.404573	A	T	0.0535795	0.00613423	2.44701e-18
rs72918674	11	59944580	0.404573	C	T	0.0533793	0.00613435	3.26932e-18
rs7946992	11	59944810	0.404573	T	C	0.0537382	0.00613426	1.94673e-18
rs631853	11	59944898	0.442346	T	G	-0.0480796	0.00606311	2.19412e-15
rs624663	11	59945065	0.442346	C	T	-0.0485394	0.00606295	1.18594e-15
rs12453	11	59945745	0.404573	T	C	0.0535597	0.00613416	2.51597e-18
rs583791	11	59947252	0.439364	C	T	-0.0479031	0.00606392	2.79587e-15
rs17602572	11	59948374	0.40159	C	G	0.0530633	0.00613511	5.18976e-18
rs632185	11	59951433	0.440358	A	G	-0.0482471	0.00606369	1.76655e-15
rs55661415	11	59952316	0.145129	C	G	0.0472938	0.0086153	4.03032e-08
rs1820430	11	59953313	0.405567	C	G	0.0539301	0.00613375	1.46461e-18
rs1834557	11	59955357	0.405567	G	A	0.0535462	0.00613405	2.56145e-18
rs56201148	11	59956938	0.405567	C	T	0.0537605	0.00613437	1.88733e-18
rs636147	11	59957092	0.44334	C	T	-0.048506	0.00606339	1.24612e-15
rs1834549	11	59957513	0.405567	C	T	0.0537629	0.00613441	1.88193e-18
rs2081545	11	59958380	0.405567	C	A	0.0537508	0.0061345	1.91732e-18
rs1834550	11	59959843	0.405567	T	C	0.0536802	0.00613467	2.12758e-18
rs1834551	11	59959969	0.406561	G	A	0.0537528	0.00613461	1.91453e-18
rs10897011	11	59961427	0.405567	G	A	0.0536552	0.00613472	2.20751e-18
rs11230180	11	59961486	0.405567	G	T	0.0536047	0.00613475	2.37528e-18
rs7926729	11	59961786	0.405567	C	T	0.0536155	0.00613493	2.34379e-18
rs7926344	11	59962166	0.406561	G	A	0.0536254	0.00613479	2.30647e-18
rs7926354	11	59962189	0.407555	G	A	0.0536554	0.00613457	2.20282e-18
rs7116190	11	59964992	0.406561	G	A	0.0531642	0.00613423	4.44394e-18
rs11230183	11	59965725	0.406561	C	T	0.0530944	0.00613422	4.90997e-18
rs11230184	11	59965789	0.406561	G	A	0.0531321	0.00613421	4.65187e-18
rs2123314	11	59966295	0.407555	T	C	0.0531902	0.00613382	4.26006e-18
rs7933805	11	59967526	0.406561	A	G	0.0530974	0.00613417	4.8859e-18
rs652303	11	59970047	0.39165	C	T	-0.0424673	0.00613705	4.52186e-12
rs666555	11	59970984	0.384692	G	A	-0.0413646	0.00617055	2.0342e-11
rs599862	11	59972888	0.389662	G	A	-0.0424794	0.00611301	3.67859e-12
rs588084	11	59973059	0.389662	C	T	-0.0424784	0.00611298	3.68202e-12
rs668287	11	59974629	0.389662	G	T	-0.0420879	0.00611294	5.77698e-12
rs7929589	11	59975078	0.400596	C	T	0.0528805	0.00613315	6.57536e-18
rs7928895	11	59975165	0.40159	G	A	0.0528231	0.00613324	7.14288e-18
rs673141	11	59975710	0.389662	C	T	-0.0419402	0.00611324	6.85973e-12
rs7932740	11	59976111	0.400596	G	A	0.052833	0.00613331	7.04857e-18
rs604085	11	59977401	0.390656	G	A	-0.0417278	0.00611319	8.73983e-12
rs1285231	11	59979408	0.389662	T	C	-0.0417538	0.00611309	8.47859e-12
rs1151119	11	59979932	0.388668	G	A	-0.0417465	0.00611313	8.55144e-12
rs11230194	11	59980315	0.400596	C	G	0.0527475	0.00613337	7.96493e-18
rs1426253	11	59981218	0.400596	A	C	0.0525372	0.00613305	1.0691e-17
rs603568	11	59981619	0.389662	T	C	-0.0415998	0.00611313	1.0105e-11
rs670854	11	59981769	0.389662	T	C	-0.0417756	0.00611308	8.26919e-12
rs4939320	11	59981801	0.400596	T	C	0.052476	0.00613309	1.16631e-17
rs11603507	11	59982470	0.400596	T	A	0.0526793	0.00613314	8.75082e-18
rs56273223	11	59984676	0.400596	A	C	0.0527279	0.00613307	8.16003e-18
rs1820428	11	59986333	0.400596	A	T	0.0527972	0.00613308	7.39637e-18
rs4492839	11	59986399	0.400596	T	A	0.0527945	0.00613309	7.42501e-18
rs688460	11	59986710	0.390656	C	T	-0.0416801	0.00611313	9.22364e-12
rs56357056	11	59986817	0.400596	A	G	0.052748	0.0061331	7.93365e-18
rs584469	11	59988862	0.390656	T	C	-0.0414382	0.00611293	1.21198e-11
rs657928	11	59988906	0.389662	G	A	-0.0423396	0.00611275	4.31549e-12
rs2081547	11	59989430	0.400596	C	T	0.0527638	0.00613324	7.7703e-18
rs620612	11	59991847	0.390656	C	T	-0.0417236	0.00608923	7.2812e-12
rs1349667	11	59993346	0.399602	T	A	0.0521813	0.00620584	4.15564e-17
rs673996	11	59994152	0.390656	C	A	-0.0422749	0.0061127	4.64868e-12
rs11601689	11	59996266	0.400596	G	C	0.0530035	0.00613288	5.49918e-18
rs610352	11	59996968	0.475149	G	C	-0.0452864	0.00601336	5.0367e-14
rs11230201	11	59996994	0.400596	C	G	0.0529202	0.00613296	6.19888e-18
rs600550	11	59997666	0.390656	C	T	-0.041726	0.00608911	7.25377e-12
rs2015475	11	59998963	0.400596	A	C	0.0531886	0.00613269	4.21067e-18
rs7936120	11	60000574	0.400596	T	A	0.0523781	0.00613263	1.33201e-17
rs1426250	11	60001325	0.400596	A	G	0.0525102	0.0061326	1.10476e-17
rs676309	11	60001573	0.389662	T	C	-0.0415715	0.00608889	8.64466e-12
rs678384	11	60002192	0.389662	T	G	-0.0415682	0.00608891	8.67862e-12
rs718376	11	60002935	0.393638	G	A	0.0542675	0.00617008	1.42722e-18
rs621965	11	60004828	0.389662	G	A	-0.041406	0.00608888	1.04417e-11
rs633463	11	60005173	0.390656	T	G	-0.0413036	0.00608876	1.17225e-11
rs611267	11	60005268	0.474155	A	G	-0.0445075	0.006013	1.34265e-13
rs72920867	11	60005424	0.400596	T	C	0.052021	0.0061324	2.19506e-17
rs650943	11	60006765	0.389662	A	C	-0.0407776	0.00608883	2.12583e-11
rs1834554	11	60007573	0.146123	G	C	0.0472095	0.00852868	3.10565e-08
rs1019671	11	60008151	0.400596	T	C	0.0523642	0.00613281	1.36116e-17
rs611418	11	60011013	0.399602	C	T	-0.0523551	0.00612777	1.29773e-17
rs627081	11	60012154	0.387674	G	T	-0.0412769	0.0061142	1.46846e-11
rs603648	11	60012673	0.399602	A	T	-0.052475	0.00610384	8.17948e-18
rs600064	11	60013451	0.399602	A	G	-0.0523929	0.00610366	9.17557e-18
rs654415	11	60013674	0.399602	G	A	-0.0522414	0.00612741	1.51689e-17
rs655231	11	60013857	0.399602	G	A	-0.0523087	0.00610356	1.03306e-17
rs592894	11	60014896	0.387674	A	G	-0.0412446	0.00611392	1.51965e-11
rs3132886	11	60016387	0.399602	T	A	-0.0531773	0.00612687	3.98039e-18
rs2509801	11	60016932	0.399602	A	G	-0.0530862	0.00617363	8.05138e-18
rs2433239	11	60017018	0.321074	T	C	-0.036682	0.00631304	6.22799e-09
rs636317	11	60019150	0.398608	C	T	-0.0524167	0.00610263	8.75851e-18
rs636341	11	60019161	0.398608	A	C	-0.052547	0.00612666	9.75672e-18
rs672399	11	60020112	0.40159	T	G	-0.0529837	0.0061017	3.84002e-18
rs675655	11	60020874	0.387674	G	C	-0.041032	0.00611401	1.93101e-11
rs1582763	11	60021948	0.362823	G	A	0.0556497	0.00623531	4.45994e-19
rs1562990	11	60023087	0.40159	C	A	-0.0517534	0.00609954	2.16086e-17
rs7121656	11	60024008	0.400596	C	T	-0.051978	0.00610854	1.75331e-17
rs6591559	11	60025565	0.400596	A	G	-0.0520991	0.00613261	1.97234e-17
rs4938931	11	60026613	0.403579	G	T	-0.0514272	0.00613003	4.8865e-17
rs1365247	11	60027309	0.384692	C	T	-0.0399914	0.00611005	5.94256e-11
rs7108663	11	60028142	0.403579	C	T	-0.0516983	0.00612953	3.33217e-17
rs1530915	11	60028917	0.387674	A	G	-0.0409414	0.00610807	2.04411e-11
rs1530914	11	60028940	0.400596	C	T	-0.0524847	0.00613258	1.14504e-17
rs1026256	11	60029931	0.400596	T	A	-0.0525108	0.00613243	1.1015e-17
rs1026255	11	60029949	0.400596	G	A	-0.0526037	0.00613241	9.65556e-18
rs1026254	11	60030457	0.400596	T	C	-0.0525695	0.00613249	1.01446e-17
rs1026253	11	60030556	0.399602	G	A	-0.0526963	0.00613258	8.48418e-18
rs1026252	11	60030559	0.399602	C	T	-0.052601	0.00613244	9.6952e-18
rs7128450	11	60031270	0.400596	G	C	-0.0525335	0.00613182	1.05888e-17
rs10736700	11	60031399	0.400596	T	C	-0.0525885	0.00613234	9.8575e-18
rs10736701	11	60031476	0.400596	C	T	-0.0525638	0.0061318	1.01418e-17
rs7930318	11	60033371	0.400596	C	T	-0.0526471	0.00613171	9.00168e-18
rs4938932	11	60033448	0.400596	C	T	-0.052701	0.00613219	8.38823e-18
rs4938933	11	60034429	0.403579	C	T	-0.0518038	0.00612905	2.85942e-17
rs12421663	11	60035550	0.321074	A	G	-0.0372369	0.00630187	3.44474e-09
rs11230222	11	60035865	0.321074	A	T	-0.0372417	0.00630203	3.43174e-09
rs10897020	11	60037567	0.321074	T	C	-0.0371216	0.00630235	3.85929e-09
rs2162254	11	60039917	0.40159	T	A	-0.0521887	0.00616	2.40818e-17
rs11230227	11	60041862	0.32008	C	A	-0.0378191	0.00635498	2.6634e-09
rs2044982	11	60045677	0.429423	T	C	-0.0331585	0.00607475	4.80386e-08
rs2044981	11	60060016	0.430417	T	C	-0.0329408	0.00602254	4.51097e-08
rs11230235	11	60063596	0.430417	G	T	-0.0331143	0.00602236	3.82903e-08
rs55777218	11	60070946	0.366799	T	C	0.0492985	0.00621512	2.15601e-15
rs11230239	11	60072149	0.305169	C	T	-0.0374045	0.00639507	4.9466e-09
rs11230240	11	60072975	0.305169	G	A	-0.0373045	0.00639437	5.41285e-09
rs10431136	11	60074313	0.305169	A	T	-0.0372888	0.00639446	5.49593e-09
rs11824734	11	60076693	0.362823	G	A	0.0507573	0.00619522	2.54827e-16
rs11824773	11	60076940	0.366799	G	C	0.0496761	0.00619242	1.03966e-15
rs11230243	11	60077772	0.348907	C	A	-0.0380983	0.00625323	1.11105e-09
rs7103808	11	60078176	0.314115	A	G	-0.037044	0.00636206	5.79259e-09
rs61900467	11	60078475	0.357853	C	T	0.0503299	0.00622427	6.16247e-16
rs10897027	11	60078699	0.347913	G	A	-0.0383616	0.00625165	8.45024e-10
rs61900468	11	60079555	0.313121	C	T	-0.0369175	0.00636276	6.54786e-09
rs10792263	11	60079651	0.357853	C	T	-0.0501165	0.00619947	6.26746e-16
rs12802385	11	60080010	0.346918	G	A	-0.0384115	0.0062522	8.06319e-10
rs10897028	11	60080627	0.347913	C	T	-0.0383904	0.00625212	8.23255e-10
rs35905922	11	60080733	0.346918	G	A	-0.0384434	0.00625186	7.79164e-10
rs7108879	11	60081274	0.347913	C	T	-0.0383191	0.00625191	8.83345e-10
rs12792791	11	60082497	0.313121	G	A	-0.0369646	0.0063624	6.25318e-09
rs12225299	11	60084465	0.311133	G	A	-0.0368087	0.00636251	7.24021e-09
rs10897030	11	60085012	0.34493	G	A	-0.0384753	0.00627561	8.73617e-10
rs10897031	11	60085080	0.34493	T	C	-0.0385113	0.00625204	7.28345e-10
rs10897032	11	60085303	0.34493	A	G	-0.0385131	0.00625204	7.2702e-10
rs10792264	11	60085490	0.34493	A	T	-0.0384822	0.00625204	7.50106e-10
rs11230248	11	60085893	0.311133	T	C	-0.0369309	0.00636248	6.45622e-09
rs1899572	11	60086024	0.312127	C	A	-0.0368202	0.00640912	9.19434e-09
rs11605188	11	60086277	0.34493	A	G	-0.038386	0.00625205	8.26524e-10
rs1899571	11	60086300	0.34493	C	T	-0.0384169	0.00625204	8.01148e-10
rs11605235	11	60086474	0.345924	A	C	-0.0384187	0.00625204	7.99689e-10
rs1020288	11	60087276	0.34493	G	A	-0.0384169	0.00625204	8.01148e-10
rs10897033	11	60087328	0.345924	C	T	-0.0379808	0.00627567	1.43002e-09
rs4475940	11	60087946	0.34493	C	T	-0.0384169	0.00625205	8.01223e-10
rs4258399	11	60088056	0.34493	G	A	-0.0384169	0.00625205	8.01223e-10
rs4258400	11	60088071	0.34493	G	C	-0.0384169	0.00625205	8.01223e-10
rs4354705	11	60088159	0.357853	C	G	-0.050524	0.00620057	3.6913e-16
rs4475941	11	60088173	0.34493	C	T	-0.0384645	0.00625247	7.65674e-10
rs4436562	11	60088221	0.34493	A	G	-0.038416	0.00625204	8.01827e-10
rs11560910	11	60088414	0.345924	T	C	-0.0384146	0.00625204	8.03009e-10
rs11230250	11	60088724	0.34493	T	C	-0.0382613	0.00625205	9.36899e-10
rs11230251	11	60088755	0.311133	G	A	-0.036701	0.00636282	8.01954e-09
rs11230252	11	60088787	0.34493	G	A	-0.0384086	0.00625212	8.08299e-10
rs12222485	11	60089175	0.34493	C	G	-0.0384224	0.00625202	7.96596e-10
rs11525457	11	60089299	0.34493	G	T	-0.0382814	0.00627557	1.06027e-09
rs11230254	11	60089642	0.34493	T	C	-0.0385646	0.00625197	6.89893e-10
rs10897035	11	60089781	0.34493	A	G	-0.0384408	0.00625198	7.81792e-10
rs10897036	11	60090146	0.345924	G	C	-0.0363546	0.00643503	1.60926e-08
rs11230255	11	60090147	0.345924	G	A	-0.0364727	0.00643502	1.44604e-08
rs11560964	11	60090311	0.34493	T	G	-0.0383503	0.0062989	1.14036e-09
rs11560911	11	60090369	0.313121	G	A	-0.0367647	0.00640903	9.67165e-09
rs7945487	11	60090379	0.352883	G	A	-0.0377007	0.00626436	1.76262e-09
rs11560913	11	60090389	0.347913	T	C	-0.0386174	0.00630127	8.87088e-10
rs11559565	11	60090532	0.34493	A	G	-0.0384866	0.00625197	7.4649e-10
rs10897038	11	60090771	0.34493	A	G	-0.0388624	0.00632468	8.0181e-10
rs10897039	11	60090776	0.34493	G	A	-0.0390541	0.00632215	6.51894e-10
rs10897040	11	60090790	0.34493	T	C	-0.0391961	0.00639038	8.59047e-10
rs11230256	11	60091038	0.34493	A	G	-0.0383888	0.00625195	8.23693e-10
rs11230257	11	60091107	0.34493	C	A	-0.0383885	0.00625195	8.23994e-10
rs11230258	11	60091449	0.34493	G	A	-0.0383583	0.00625196	8.4943e-10
rs10897041	11	60091554	0.34493	G	A	-0.0383513	0.00627553	9.8857e-10
rs11230259	11	60092160	0.34493	T	C	-0.0383883	0.00625196	8.24128e-10
rs11230261	11	60092380	0.34493	T	C	-0.0383884	0.00625195	8.24082e-10
rs7943848	11	60092590	0.311133	T	C	-0.0367607	0.00636243	7.5693e-09
rs7943967	11	60092650	0.34493	T	A	-0.0385105	0.00625194	7.28553e-10
rs7943993	11	60092722	0.34493	T	C	-0.0383867	0.00625196	8.25462e-10
rs4278536	11	60093318	0.34493	T	C	-0.0383552	0.00625196	8.52102e-10
rs4442568	11	60093479	0.34493	G	C	-0.038406	0.00625196	8.09557e-10
rs4576843	11	60093527	0.34493	C	T	-0.0383552	0.00625196	8.52102e-10
rs4582994	11	60093584	0.34493	C	G	-0.0383615	0.00625199	8.46836e-10
rs4576844	11	60093632	0.34493	C	T	-0.0383188	0.00625204	8.84283e-10
rs10897042	11	60093790	0.34493	T	C	-0.0383188	0.00625204	8.84283e-10
rs4430535	11	60093869	0.345924	T	C	-0.0382142	0.0062521	9.82552e-10
rs4594016	11	60093922	0.346918	A	G	-0.0382588	0.00625391	9.50027e-10
rs4430536	11	60093926	0.346918	T	C	-0.0383234	0.00625442	8.93211e-10
rs4522186	11	60093969	0.346918	A	G	-0.0381868	0.00625408	1.02225e-09
rs4444096	11	60094004	0.311133	G	C	-0.0366425	0.00636481	8.55992e-09
rs4447193	11	60094293	0.34493	C	A	-0.0383865	0.00627567	9.55267e-10
rs11230263	11	60094530	0.343936	G	A	-0.0383651	0.00625201	8.43886e-10
rs11230264	11	60094684	0.34493	T	G	-0.0383588	0.00625198	8.49128e-10
rs11230265	11	60094819	0.34493	C	T	-0.0383646	0.00625199	8.44247e-10
rs11230266	11	60094842	0.34493	C	T	-0.0383037	0.00625203	8.97771e-10
rs11230267	11	60094858	0.34493	C	T	-0.0383335	0.006252	8.71099e-10
rs12798846	11	60095190	0.34493	A	G	-0.0384957	0.006252	7.39772e-10
rs12798140	11	60095226	0.345924	C	T	-0.0384717	0.00625205	7.58165e-10
rs12803929	11	60095242	0.34493	T	C	-0.0384029	0.00625201	8.12409e-10
rs12804091	11	60095298	0.34493	T	C	-0.0383328	0.00627556	1.00718e-09
rs71460573	11	60095318	0.34493	T	C	-0.0383328	0.00627556	1.00718e-09
rs12797040	11	60095396	0.34493	G	A	-0.0385177	0.00627555	8.37004e-10
rs12226656	11	60095595	0.34493	T	C	-0.0383401	0.00625201	8.65355e-10
rs72924626	11	60095740	0.357853	T	C	0.0514874	0.00622762	1.367e-16
rs11230268	11	60095938	0.34493	T	C	-0.0383247	0.00625201	8.78919e-10
rs6591565	11	60096514	0.34493	C	T	-0.0383305	0.00625209	8.74257e-10
rs6591567	11	60096638	0.34493	C	G	-0.0386546	0.00636817	1.27941e-09
rs6591568	11	60096640	0.34493	T	C	-0.0387148	0.00636815	1.20606e-09
rs7931689	11	60096688	0.34493	T	C	-0.0381394	0.00636793	2.10769e-09
rs11230273	11	60096917	0.34493	G	A	-0.038329	0.0062758	1.01247e-09
rs11230274	11	60096970	0.34493	A	G	-0.0382962	0.00627587	1.04663e-09
rs12799384	11	60097040	0.34493	C	T	-0.0381372	0.00627593	1.22652e-09
rs12800288	11	60097094	0.34493	A	T	-0.0369102	0.00643535	9.72003e-09
rs11605441	11	60097360	0.343936	A	G	-0.0372155	0.00630731	3.62651e-09
rs11607307	11	60097452	0.324056	G	C	-0.036098	0.00647862	2.52024e-08
rs11605466	11	60097461	0.324056	A	T	-0.0359577	0.00650103	3.18283e-08
rs11605914	11	60097557	0.32505	T	C	-0.0373993	0.00636335	4.17007e-09
rs11603352	11	60097593	0.32505	C	T	-0.0381686	0.00638612	2.27547e-09
rs7939273	11	60098343	0.34493	T	C	-0.038364	0.00625229	8.46334e-10
rs7950431	11	60098651	0.34493	C	T	-0.0383327	0.00625227	8.73301e-10
rs11230275	11	60099095	0.34493	A	G	-0.0382998	0.00625228	9.02703e-10
rs11230276	11	60099106	0.34493	T	C	-0.0382286	0.00625243	9.70431e-10
rs11230277	11	60099212	0.34493	T	C	-0.0382417	0.00625243	9.57746e-10
rs4939338	11	60099225	0.358847	T	C	-0.0505586	0.00622503	4.59229e-16
rs10897044	11	60099352	0.34493	C	T	-0.0382406	0.00625242	9.58777e-10
rs10897045	11	60099613	0.34493	T	G	-0.0382372	0.00625254	9.62754e-10
rs10897046	11	60099677	0.34493	T	C	-0.0382372	0.00625254	9.62754e-10
rs10897047	11	60099810	0.34493	T	C	-0.0382136	0.00625258	9.86075e-10
rs10897048	11	60099894	0.34493	C	T	-0.0380859	0.0062526	1.1206e-09
rs11827324	11	60099912	0.357853	A	G	0.0508572	0.00622701	3.15644e-16
rs10750932	11	60100079	0.34493	T	A	-0.0382029	0.00625259	9.96779e-10
rs2868118	11	60100351	0.34493	C	T	-0.038206	0.00628029	1.1761e-09
rs2868119	11	60100359	0.34493	C	T	-0.0382338	0.0062803	1.14407e-09
rs2868120	11	60100363	0.34493	T	G	-0.0382194	0.00628052	1.16211e-09
rs2868121	11	60100429	0.34493	G	A	-0.0379121	0.00625274	1.33382e-09
rs10897049	11	60100581	0.312127	C	T	-0.0365399	0.00636452	9.40197e-09
rs4477457	11	60100607	0.34493	G	A	-0.0381886	0.00625424	1.02134e-09
rs10792265	11	60100619	0.34493	A	G	-0.0383029	0.0062541	9.10019e-10
rs7116069	11	60100776	0.345924	T	C	-0.0386025	0.00625221	6.64965e-10
rs10750933	11	60101036	0.34493	T	A	-0.0383064	0.0062523	8.96799e-10
rs10750934	11	60101402	0.345924	C	T	-0.0380382	0.00627626	1.35579e-09
rs10750935	11	60101453	0.34493	T	C	-0.0380508	0.00625254	1.16011e-09
rs4506675	11	60101593	0.34493	C	T	-0.0380032	0.00625255	1.21673e-09
rs10792267	11	60101718	0.34493	A	G	-0.0379654	0.00625294	1.26637e-09
rs7924433	11	60101848	0.34493	C	G	-0.0379916	0.00627669	1.42348e-09
rs2304936	11	60102156	0.311133	T	C	-0.0370291	0.00643238	8.5791e-09
rs2304935	11	60102384	0.312127	A	G	-0.0366056	0.00636263	8.75609e-09
rs2304934	11	60102396	0.311133	A	G	-0.0367448	0.00636304	7.70804e-09
rs2304933	11	60102507	0.311133	G	T	-0.0368407	0.00636204	7.00907e-09
rs10792268	11	60102631	0.311133	A	G	-0.036756	0.00636199	7.58506e-09
rs1443250	11	60102790	0.312127	G	A	0.037671	0.00636095	3.17604e-09
rs11230280	11	60103096	0.312127	A	C	-0.0370656	0.00636279	5.69834e-09
rs12798157	11	60103112	0.311133	T	C	-0.0370439	0.0063863	6.61059e-09
rs72924659	11	60103385	0.294235	C	T	0.0513663	0.00668087	1.48801e-14
rs7931525	11	60103826	0.313121	G	A	0.0373592	0.00638522	4.88954e-09
rs2289614	11	60105199	0.284294	G	C	-0.0390143	0.00667245	5.00289e-09
rs598561	11	85652826	0.49006	G	A	-0.0332136	0.00600767	3.229e-08
rs1237230	11	85655105	0.180915	A	C	-0.0534373	0.00764362	2.72734e-12
rs579406	11	85657759	0.467197	A	C	-0.0338656	0.00601525	1.80248e-08
rs2458499	11	85659847	0.180915	C	T	-0.0528165	0.00761736	4.09964e-12
rs75751	11	85664904	0.189861	G	C	-0.0514277	0.00760225	1.33494e-11
rs11234493	11	85666138	0.180915	T	C	-0.0537276	0.00759025	1.45727e-12
rs556562	11	85666440	0.180915	A	C	-0.0526657	0.00764014	5.45174e-12
rs673751	11	85670945	0.321074	A	C	-0.0596696	0.00644033	1.95081e-20
rs618679	11	85671702	0.184891	A	C	-0.0526403	0.007542	2.95984e-12
rs2077815	11	85672383	0.193837	G	A	-0.0506367	0.00750306	1.49074e-11
rs592314	11	85673124	0.184891	A	G	-0.0523205	0.00754184	3.99483e-12
rs548121	11	85675533	0.180915	C	T	-0.0515876	0.00758646	1.04646e-11
rs639012	11	85681583	0.313121	A	G	-0.0606686	0.00644406	4.74618e-21
rs626542	11	85682120	0.193837	T	G	-0.0510732	0.00752801	1.16557e-11
rs606505	11	85682817	0.32008	A	G	-0.05956	0.0064389	2.24427e-20
rs637304	11	85685166	0.180915	A	G	-0.0521944	0.00758896	6.08374e-12
rs601185	11	85686151	0.189861	A	T	-0.050766	0.00757432	2.0505e-11
rs600743	11	85686223	0.180915	A	T	-0.0522714	0.00758868	5.65499e-12
rs618629	11	85689435	0.189861	T	C	-0.0507962	0.0075828	2.1003e-11
rs587038	11	85689712	0.32008	A	T	-0.0598941	0.00644103	1.41987e-20
rs588076	11	85691662	0.189861	G	C	-0.0501901	0.00755728	3.10953e-11
rs645299	11	85691810	0.321074	C	A	-0.0598672	0.00643958	1.44776e-20
rs2508688	11	85692342	0.189861	A	C	-0.0508288	0.00758275	2.03889e-11
rs585820	11	85696670	0.184891	G	A	-0.0528335	0.00754861	2.57608e-12
rs627818	11	85698207	0.193837	A	T	-0.0513009	0.00751034	8.44967e-12
rs670606	11	85698598	0.184891	G	A	-0.052898	0.00754887	2.42771e-12
rs654194	11	85700000	0.180915	C	A	-0.0529219	0.00759728	3.26296e-12
rs488134	11	85701622	0.178926	T	C	-0.0524005	0.00762458	6.30507e-12
rs682366	11	85701741	0.176938	T	C	-0.0526323	0.00762603	5.13986e-12
rs659801	11	85702967	0.182903	G	T	-0.0498625	0.00755934	4.21969e-11
rs595972	11	85705885	0.182903	G	T	-0.0524179	0.0075406	3.61615e-12
rs542167	11	85707228	0.187873	A	G	-0.0508109	0.00757877	2.02268e-11
rs602391	11	85709348	0.178926	C	G	-0.047756	0.00751681	2.10857e-10
rs603615	11	85709559	0.187873	G	A	-0.0511431	0.00757622	1.4736e-11
rs600258	11	85710169	0.187873	G	A	-0.0507518	0.00757877	2.13363e-11
rs616555	11	85710180	0.178926	G	A	-0.0513758	0.00759397	1.3299e-11
rs2155051	11	85713565	0.187873	A	C	-0.0510887	0.00757954	1.58016e-11
rs527162	11	85715736	0.181909	C	T	-0.0534137	0.00755235	1.52211e-12
rs528109	11	85715853	0.191849	C	T	-0.0519611	0.00751335	4.65096e-12
rs2508696	11	85717923	0.32008	A	C	-0.0600651	0.00644592	1.18212e-20
rs602222	11	85718231	0.322068	G	T	-0.0601401	0.00643739	9.42451e-21
rs2458496	11	85718816	0.17992	C	G	-0.0530629	0.00759934	2.89848e-12
rs636355	11	85724661	0.319085	T	C	-0.0599533	0.00644563	1.38626e-20
rs622220	11	85725621	0.191849	C	T	-0.0514027	0.00750593	7.47448e-12
rs592297	11	85725937	0.182903	C	T	-0.0528657	0.00754359	2.41691e-12
rs494369	11	85726364	0.187873	A	T	-0.0509292	0.00755344	1.55672e-11
rs648270	11	85726818	0.178926	T	C	-0.052545	0.00759189	4.47827e-12
rs1996108	11	85728030	0.187873	T	C	-0.0508709	0.00757923	1.92123e-11
rs655641	11	85731286	0.187873	C	G	-0.0510063	0.00757817	1.68859e-11
rs676733	11	85734010	0.319085	C	T	-0.0601116	0.00644573	1.10151e-20
rs609903	11	85740409	0.318091	A	G	-0.0599021	0.00644638	1.50884e-20
rs682928	11	85741130	0.310139	C	T	-0.0609945	0.00645181	3.26565e-21
rs547767	11	85743449	0.178926	A	G	-0.0514519	0.00754576	9.18979e-12
rs561646	11	85746037	0.319085	C	T	-0.0585188	0.00644471	1.08437e-19
rs1973630	11	85748386	0.309145	T	C	-0.0579491	0.00642656	1.93092e-19
rs2508691	11	85750671	0.310139	A	T	-0.0604305	0.00645038	7.35487e-21
rs677909	11	85757589	0.319085	C	T	-0.0600827	0.00644817	1.18787e-20
rs659863	11	85757613	0.315109	C	G	-0.0596428	0.00648468	3.66422e-20
rs677869	11	85757617	0.315109	C	T	-0.0596259	0.0064846	3.75004e-20
rs694011	11	85760028	0.319085	T	C	-0.0597607	0.00644524	1.82568e-20
rs669813	11	85762244	0.311133	C	T	-0.0608746	0.00645212	3.91659e-21
rs497711	11	85764875	0.189861	T	G	-0.0517081	0.00757657	8.8087e-12
rs493254	11	85765298	0.311133	G	A	-0.0612113	0.00647543	3.29735e-21
rs489486	11	85765737	0.180915	T	C	-0.0533474	0.00761491	2.45844e-12
rs9804630	11	85766582	0.189861	A	G	-0.0515707	0.00757639	9.98233e-12
rs634719	11	85771065	0.189861	T	C	-0.0516753	0.00757553	9.01942e-12
rs635168	11	85771170	0.180915	T	C	-0.0531223	0.00761469	3.03089e-12
rs867611	11	85776544	0.312127	G	A	-0.0614077	0.00647517	2.45759e-21
rs544458	11	85778924	0.189861	C	T	-0.0519056	0.00757594	7.31449e-12
rs2509609	11	85779162	0.180915	C	G	-0.0529546	0.00761511	3.5538e-12
rs2509608	11	85779297	0.180915	T	G	-0.0532457	0.00761456	2.69803e-12
rs2458500	11	85779310	0.180915	A	G	-0.0533534	0.00761548	2.45363e-12
rs3016327	11	85780448	0.180915	T	C	-0.0504821	0.00756783	2.54716e-11
rs669556	11	85781322	0.184891	C	T	-0.0522181	0.00758508	5.80628e-12
rs2458493	11	85783875	0.17992	A	G	-0.0525264	0.00766284	7.14701e-12
rs536841	11	85787824	0.309145	C	T	-0.0626038	0.00649435	5.43268e-22
rs541458	11	85788351	0.318091	C	T	-0.0617344	0.00648918	1.84475e-21
rs535590	11	85794542	0.314115	A	G	-0.0624115	0.00656024	1.84178e-21
rs683912	11	85794760	0.314115	C	T	-0.0617498	0.00658382	6.65899e-21
rs534128	11	85794761	0.313121	A	G	-0.0632926	0.00661086	1.02803e-21
rs565719	11	85795524	0.310139	T	C	-0.06135	0.00658161	1.14783e-20
rs480781	11	85795950	0.301193	A	G	-0.0624151	0.00661139	3.70851e-21
rs631639	11	85798020	0.310139	T	G	-0.0613161	0.00660845	1.71994e-20
rs561655	11	85800279	0.348907	G	A	-0.063304	0.00633923	1.75393e-23
rs645293	11	85809825	0.345924	T	C	-0.0591411	0.00627768	4.4744e-21
rs629343	11	85811138	0.406561	A	G	-0.0344273	0.00607468	1.45034e-08
rs542126	11	85811238	0.373757	A	G	-0.059613	0.00622515	1.00738e-21
rs526904	11	85811364	0.359841	T	C	-0.06124	0.00630944	2.84027e-22
rs566975	11	85811696	0.359841	C	A	-0.0613064	0.00635668	5.1916e-22
rs497816	11	85812210	0.360835	C	T	-0.0612886	0.0063093	2.62807e-22
rs17745409	11	85812785	0.16998	A	G	0.0499353	0.00835941	2.32159e-09
rs583162	11	85813817	0.419483	A	G	-0.0339193	0.0060335	1.88958e-08
rs586274	11	85814486	0.333002	T	G	-0.0614485	0.00639162	6.98379e-22
rs1237999	11	85815030	0.360835	G	A	-0.060976	0.00630953	4.2831e-22
rs543293	11	85820077	0.33002	A	G	-0.0611541	0.00639123	1.08533e-21
rs631611	11	85823324	0.468191	C	T	-0.0468797	0.00601768	6.68353e-15
rs646260	11	85824288	0.449304	A	G	-0.0359656	0.00603473	2.52587e-09
rs659023	11	85824859	0.380716	A	G	-0.0592316	0.00622547	1.82763e-21
rs598726	11	85828548	0.345924	G	A	-0.062421	0.00636074	9.8507e-23
rs474479	11	85828551	0.318091	C	G	-0.0628379	0.00644628	1.8826e-22
rs567075	11	85830157	0.318091	T	C	-0.0626939	0.00644208	2.20375e-22
rs573167	11	85831246	0.333002	G	A	-0.0618889	0.0063872	3.34062e-22
rs580887	11	85831433	0.415507	A	T	-0.0345047	0.00603521	1.08275e-08
rs471470	11	85831541	0.333002	C	A	-0.0602898	0.00634794	2.14934e-21
rs472486	11	85831690	0.360835	A	G	-0.0616487	0.00630552	1.41408e-22
rs519961	11	85832424	0.333002	T	C	-0.0619513	0.00638798	3.07138e-22
rs10792830	11	85838808	0.427435	G	A	-0.0346602	0.00602241	8.6539e-09
rs7114331	11	85839719	0.428429	G	A	-0.0344727	0.00602321	1.04469e-08
rs7114401	11	85839935	0.419483	C	T	-0.0525702	0.00609	6.01678e-18
rs67598967	11	85843197	0.16004	G	A	0.0510682	0.0088054	6.64552e-09
rs4944560	11	85845045	0.457256	A	G	-0.0498724	0.00601942	1.17856e-16
rs7938634	11	85845473	0.384692	A	G	-0.0503152	0.00620519	5.12146e-16
rs2028338	11	85846796	0.413519	C	T	-0.0347289	0.00611578	1.35825e-08
rs11234554	11	85849094	0.461233	C	G	-0.0496033	0.00611018	4.73433e-16
rs11234556	11	85849411	0.499006	T	C	-0.0501449	0.0060048	6.77953e-17
rs3844143	11	85850243	0.5	C	T	-0.0498504	0.00600512	1.0296e-16
rs10792831	11	85852979	0.49006	G	A	-0.0470266	0.00600639	4.90122e-15
rs3915642	11	85853251	0.450298	T	G	-0.0480714	0.00602507	1.48036e-15
rs2888903	11	85854176	0.451292	G	T	-0.0482337	0.00604908	1.53958e-15
rs7110631	11	85856187	0.316103	C	G	-0.062634	0.00650981	6.48905e-22
rs7952506	11	85857639	0.491054	T	C	-0.0476068	0.00600781	2.29725e-15
rs10898438	11	85858253	0.491054	G	A	-0.0475696	0.00600817	2.4235e-15
rs3851178	11	85858497	0.491054	G	T	-0.0472633	0.00598395	2.82645e-15
rs7941541	11	85858538	0.316103	G	A	-0.0627562	0.0065108	5.48312e-22
rs10751134	11	85858887	0.412525	G	A	-0.0509339	0.00612279	8.89003e-17
rs10898439	11	85859483	0.491054	G	C	-0.0469184	0.00600774	5.73427e-15
rs10898440	11	85859916	0.452286	C	T	-0.050083	0.00604557	1.18864e-16
rs9787874	11	85860305	0.491054	G	A	-0.0470597	0.00600803	4.77131e-15
rs10792832	11	85867875	0.371769	A	G	-0.0654004	0.00622465	8.04831e-26
rs3851179	11	85868640	0.370775	T	C	-0.0654906	0.0062225	6.6404e-26
rs7113976	11	85869737	0.406561	C	T	-0.046054	0.00608902	3.9252e-14
rs7129687	11	85871184	0.415507	G	C	-0.038335	0.0062577	9.00839e-10
rs3901732	11	85873779	0.439364	G	A	-0.0348162	0.0062655	2.74754e-08
rs11603136	11	85874322	0.424453	A	C	0.0349091	0.00627969	2.7123e-08
rs11234568	11	85876222	0.403579	G	A	-0.0372105	0.00619158	1.85696e-09
rs11218343	11	121435587	0.0427435	T	C	0.10884	0.0158689	6.95028e-12
rs2296495	14	53379878	0.0864811	G	A	-0.0555017	0.0100539	3.38211e-08
rs140542729	14	53382845	0.0864811	T	C	-0.0553121	0.0100543	3.76959e-08
rs74825460	14	53390015	0.0795229	C	T	-0.0620083	0.0102978	1.72815e-09
rs17125924	14	53391680	0.0795229	A	G	-0.0628115	0.0102974	1.06239e-09
rs17125944	14	53400629	0.0805169	T	C	-0.0599014	0.0103025	6.09023e-09
rs149210267	14	53414145	0.082505	C	T	-0.057209	0.0101829	1.9304e-08
rs10498633	14	92926952	0.214712	G	T	0.0399155	0.00727601	4.11356e-08
rs4904918	14	92927298	0.237575	T	C	0.0437664	0.00696559	3.316e-10
rs61977311	14	92930445	0.236581	G	A	-0.0446751	0.00696266	1.39555e-10
rs11160067	14	92931045	0.230616	C	T	0.0452577	0.00693228	6.64108e-11
rs941649	14	92931581	0.229622	C	A	0.0455373	0.00694359	5.44665e-11
rs941648	14	92931737	0.229622	G	A	0.0454277	0.0069548	6.49635e-11
rs3993878	14	92931983	0.229622	G	A	0.0455696	0.0069548	5.66739e-11
rs10129728	14	92932051	0.229622	A	G	0.045535	0.00695499	5.8664e-11
rs10130041	14	92932102	0.230616	G	A	0.045906	0.00695442	4.08471e-11
rs4900124	14	92932437	0.229622	G	A	0.0455368	0.00695431	5.83129e-11
rs4904922	14	92932479	0.229622	G	T	0.0455838	0.00695418	5.56859e-11
rs4904923	14	92932485	0.229622	G	C	0.0455839	0.00695418	5.56818e-11
rs10130373	14	92932575	0.229622	C	A	0.045372	0.00695448	6.83932e-11
rs12881735	14	92932828	0.219682	T	C	0.0417571	0.00724144	8.09767e-09
rs12880508	14	92932851	0.230616	C	T	0.045461	0.00695402	6.26105e-11
rs11160068	14	92933711	0.228628	G	A	0.0458875	0.00695549	4.18724e-11
rs11160069	14	92933893	0.229622	T	C	0.0457465	0.00695615	4.81944e-11
rs7154848	14	92934019	0.229622	T	C	0.0457553	0.00695703	4.80542e-11
rs9323877	14	92934269	0.229622	A	G	-0.0472555	0.00699446	1.41723e-11
rs7154400	14	92934315	0.22664	G	A	0.0462814	0.00700213	3.85298e-11
rs7155778	14	92934498	0.227634	T	A	0.0457458	0.00698854	5.91675e-11
rs7154691	14	92934699	0.227634	A	G	0.0462013	0.00698791	3.80176e-11
rs12893365	14	92934924	0.229622	T	A	0.0458973	0.00696379	4.37335e-11
rs12878441	14	92935713	0.224652	T	C	0.0455902	0.00698732	6.81372e-11
rs12897713	14	92935714	0.224652	G	A	0.0434115	0.00698748	5.20631e-10
rs12878453	14	92935744	0.224652	T	C	0.0439136	0.00698765	3.29005e-10
rs12897935	14	92935834	0.229622	G	A	0.0453688	0.00698738	8.41679e-11
rs12882202	14	92936070	0.229622	G	T	0.0459371	0.0069873	4.88566e-11
rs12883073	14	92936092	0.229622	T	A	0.0459844	0.00698702	4.66047e-11
rs4497611	14	92936356	0.229622	G	C	0.0462137	0.00698994	3.8053e-11
rs2896209	14	92936600	0.228628	A	C	0.0458568	0.00698826	5.30992e-11
rs4406992	14	92936620	0.228628	C	T	0.0460532	0.00698758	4.377e-11
rs12435220	14	92936683	0.193837	C	G	0.0508999	0.00737073	4.99605e-12
rs8008388	14	92936690	0.193837	G	A	0.0508902	0.0073707	5.04178e-12
rs12883528	14	92936939	0.194831	G	A	0.0501147	0.00734842	9.11732e-12
rs11623019	14	92936971	0.193837	T	C	0.050997	0.00734804	3.91507e-12
rs4904924	14	92936978	0.193837	G	A	0.0507616	0.00737201	5.74998e-12
rs4904925	14	92937019	0.193837	G	T	0.0506261	0.00737222	6.55011e-12
rs4904926	14	92937027	0.193837	C	T	0.0505062	0.00737276	7.36552e-12
rs4904929	14	92937293	0.193837	C	T	0.0507904	0.00736888	5.48002e-12
rs36026988	14	92938382	0.213718	T	C	0.0434389	0.00728335	2.45921e-09
rs11160071	14	92938415	0.193837	T	C	0.050224	0.00743245	1.40497e-11
rs12590654	14	92938855	0.336978	G	A	0.0467056	0.00650728	7.10278e-13
rs972801	15	58921198	0.312127	T	C	0.037372	0.00665666	1.97438e-08
rs28864995	15	58945671	0.310139	T	G	0.0376483	0.00665699	1.55433e-08
rs7177678	15	58959621	0.26839	A	G	0.0385824	0.00691508	2.41279e-08
rs714696	15	58962987	0.306163	C	G	0.0369441	0.00668948	3.33789e-08
rs11854073	15	58972995	0.350895	G	A	0.0395104	0.00647619	1.05495e-09
rs4775087	15	58974904	0.349901	T	C	0.0397808	0.00644754	6.83262e-10
rs12439457	15	58982390	0.345924	T	C	0.0391598	0.00647607	1.47709e-09
rs7161889	15	58983425	0.345924	G	C	0.0389391	0.00647565	1.81934e-09
rs7163162	15	58983588	0.345924	T	A	0.0388817	0.00647624	1.92821e-09
rs4774310	15	58985164	0.303181	T	G	0.0383	0.00668057	9.86412e-09
rs12911961	15	58985867	0.304175	C	T	0.0375482	0.00667791	1.87949e-08
rs12911832	15	58985904	0.302187	A	T	0.037851	0.00675162	2.06803e-08
rs12912003	15	58986001	0.304175	A	T	0.0374905	0.00667742	1.97109e-08
rs347117	15	59000957	0.349901	C	T	0.0400349	0.00644692	5.30098e-10
rs6494035	15	59015888	0.313121	C	G	0.0389333	0.00661178	3.89781e-09
rs6494036	15	59015961	0.313121	A	T	0.0388034	0.00663559	4.98214e-09
rs6494037	15	59016315	0.315109	A	G	0.0387996	0.00663563	5.00012e-09
rs2555356	15	59016431	0.355865	T	G	0.0413334	0.00643897	1.36941e-10
rs442495	15	59022615	0.354871	T	C	0.0417549	0.00644394	9.1893e-11
rs383902	15	59034174	0.359841	C	T	0.0407458	0.00636821	1.57103e-10
rs653765	15	59042012	0.314115	T	C	0.038969	0.00661651	3.87001e-09
rs593742	15	59045774	0.32008	A	G	0.040141	0.00655585	9.18693e-10
rs605928	15	59046163	0.326044	C	G	0.0389888	0.006527	2.32255e-09
rs640704	15	59049021	0.327038	A	G	0.0390235	0.0065258	2.23305e-09
rs2250583	15	59050382	0.326044	C	T	-0.0386607	0.00652655	3.14955e-09
rs596379	15	59052072	0.365805	C	T	-0.0404969	0.0063647	1.98192e-10
rs585192	15	59052210	0.326044	T	C	0.038371	0.00655069	4.69735e-09
rs507801	15	59053345	0.324056	T	G	0.0396095	0.00655333	1.50173e-09
rs572107	15	59055810	0.317097	T	C	0.0387885	0.00660265	4.23646e-09
rs602602	15	59057023	0.306163	T	A	0.0397525	0.0066485	2.24273e-09
rs650366	15	59061142	0.366799	A	G	0.0395155	0.00643686	8.30719e-10
rs17190727	15	59073790	0.353877	C	A	0.0390085	0.00641959	1.22852e-09
rs1648532	15	59076778	0.353877	G	C	0.0390278	0.00641939	1.20429e-09
rs673813	15	59077171	0.354871	A	T	0.0391272	0.00641942	1.0935e-09
rs347115	15	59082959	0.355865	C	T	0.0384173	0.00641523	2.11852e-09
rs474875	15	59086703	0.355865	T	G	0.03837	0.00641651	2.23289e-09
rs610877	15	59103328	0.356859	C	A	0.0389891	0.00641202	1.19709e-09
rs618684	15	59115922	0.358847	A	G	0.0376538	0.00641312	4.32201e-09
rs4775094	15	59115995	0.350895	A	G	0.0374186	0.00645053	6.59801e-09
rs117618017	15	63569902	0.135189	C	T	-0.0538386	0.00959617	2.01822e-08
rs61182333	17	5133128	0.138171	T	C	0.0507597	0.00878837	7.65954e-09
rs7225151	17	5137047	0.136183	G	A	-0.0518045	0.00910962	1.29446e-08
rs75511804	17	5138304	0.129225	C	T	-0.0530037	0.00917034	7.47405e-09
rs113260531	17	5138980	0.134195	G	A	-0.0517231	0.00911337	1.38267e-08
rs58124010	17	5139808	0.130219	C	T	-0.052683	0.00914347	8.3215e-09
rs4456560	17	5140399	0.136183	G	T	-0.0511783	0.00910909	1.92766e-08
rs72479703	17	5144696	0.137177	A	G	-0.0512401	0.00920238	2.5748e-08
rs113806568	17	5155919	0.131213	C	T	-0.0514304	0.0092418	2.62184e-08
rs61481506	17	5158714	0.131213	T	C	-0.0518287	0.0092419	2.04669e-08
rs9896864	17	61536308	0.0149105	A	G	-0.119553	0.021626	3.2354e-08
rs138190086	17	61538148	0.0109344	G	A	-0.127564	0.0227427	2.03465e-08
rs189894386	17	61543566	0.0119284	G	A	-0.131802	0.0241219	4.65478e-08
rs6504163	17	61545779	0.362823	C	T	-0.0346979	0.00634084	4.44637e-08
rs8077276	17	61547562	0.369781	G	A	-0.0345117	0.0062824	3.943e-08
rs4311	17	61560763	0.497018	T	C	-0.033645	0.00604804	2.65231e-08
rs8100672	19	1021637	0.280318	T	C	0.0417508	0.00742873	1.90751e-08
rs11670349	19	1036691	0.161034	C	T	-0.053489	0.00887358	1.66112e-09
rs11670373	19	1036704	0.162028	C	T	-0.0536926	0.00887436	1.44573e-09
rs1057874	19	1038571	0.329026	C	T	0.0399816	0.00688263	6.28265e-09
rs4807468	19	1039186	0.33499	G	A	0.039626	0.00687568	8.2525e-09
rs111278892	19	1039323	0.158052	C	G	-0.0595934	0.00905976	4.77409e-11
rs3795065	19	1039444	0.352883	C	T	0.0455556	0.00677283	1.7412e-11
rs3764642	19	1040046	0.471173	G	A	0.0393853	0.00644353	9.81535e-10
rs4147904	19	1040765	0.474155	A	G	0.0389488	0.00644191	1.48335e-09
rs3764645	19	1042809	0.446322	A	G	0.0370399	0.00641719	7.83417e-09
rs3752231	19	1043638	0.265408	C	T	-0.0473786	0.00736238	1.23291e-10
rs3764650	19	1046520	0.105368	T	G	-0.0595689	0.01062	2.03336e-08
rs4147910	19	1047078	0.104374	A	G	-0.0602652	0.0106447	1.50028e-08
rs4147911	19	1047687	0.104374	C	G	-0.0597478	0.010704	2.38005e-08
rs73505217	19	1048021	0.104374	A	G	-0.0599838	0.0106764	1.92785e-08
rs78410552	19	1048051	0.102386	G	T	-0.0593604	0.0106804	2.73086e-08
rs76348507	19	1048116	0.104374	G	A	-0.0594969	0.010709	2.76355e-08
rs67027268	19	1048393	0.104374	G	A	-0.0593117	0.0107039	3.0053e-08
rs12151021	19	1050874	0.337972	A	G	0.0449597	0.00677319	3.18207e-11
rs3752246	19	1056492	0.189861	G	C	0.0451997	0.0081459	2.87694e-08
rs4147929	19	1063443	0.184891	A	G	0.0460008	0.00813738	1.57648e-08
rs80257887	19	45020859	0.0357853	G	A	-0.122002	0.0181323	1.71532e-11
rs75161053	19	45048858	0.0417495	G	A	-0.132568	0.0171495	1.0744e-14
rs17714718	19	45050747	0.456262	C	T	-0.045092	0.00634782	1.21599e-12
rs12461127	19	45052601	0.435388	T	C	-0.038728	0.00635362	1.09152e-09
rs73046410	19	45053138	0.459245	A	C	-0.0449027	0.00634844	1.51601e-12
rs12462461	19	45058312	0.456262	G	C	-0.043168	0.00637106	1.23852e-11
rs62118204	19	45061761	0.456262	G	A	-0.0465474	0.00643632	4.75974e-13
rs7257289	19	45064133	0.414513	G	A	-0.038876	0.00643042	1.48816e-09
rs1727760	19	45065601	0.175944	T	C	-0.0484484	0.00827621	4.80051e-09
rs11083742	19	45071070	0.398608	G	T	-0.0469548	0.00653454	6.69005e-13
rs846881	19	45078553	0.220676	C	A	-0.0565844	0.00797136	1.26151e-12
rs846879	19	45078886	0.361829	G	A	-0.0504514	0.00670225	5.17099e-14
rs846876	19	45080065	0.364811	C	G	-0.0528038	0.00671596	3.76755e-15
rs55848260	19	45080369	0.402584	G	A	-0.048014	0.00652333	1.83428e-13
rs11669005	19	45080498	0.404573	G	A	-0.0482208	0.00650806	1.26875e-13
rs11882134	19	45123303	0.259443	G	A	-0.0419178	0.00700131	2.13572e-09
rs11083743	19	45125218	0.260437	T	C	-0.0415688	0.00699474	2.8008e-09
rs112027066	19	45129089	0.0149105	C	T	0.186201	0.02588	6.25682e-13
rs11671606	19	45130550	0.407555	C	T	-0.0366184	0.00617657	3.05517e-09
rs11668972	19	45131677	0.393638	T	A	-0.0392014	0.0062112	2.76513e-10
rs11670070	19	45131984	0.393638	A	T	-0.039166	0.00621145	2.87351e-10
rs12983889	19	45133475	0.182903	A	G	0.0455905	0.00761454	2.13355e-09
rs12977255	19	45134422	0.184891	A	G	0.0514288	0.00764633	1.74459e-11
rs12979820	19	45134626	0.184891	T	C	0.0534249	0.00769475	3.83749e-12
rs12985368	19	45135147	0.184891	C	T	0.0527885	0.00764836	5.12991e-12
rs34817927	19	45135365	0.184891	C	T	0.0522888	0.00764837	8.11004e-12
rs35823804	19	45135442	0.184891	G	A	0.0517156	0.00762261	1.16495e-11
rs12971689	19	45135579	0.184891	G	A	0.0523016	0.00764701	7.94762e-12
rs58967105	19	45136333	0.146123	C	A	0.0472977	0.00846821	2.33267e-08
rs59451830	19	45136350	0.189861	C	T	0.0560605	0.00763137	2.04144e-13
rs59669162	19	45136375	0.189861	A	G	0.0547081	0.00760934	6.49795e-13
rs60519804	19	45136383	0.189861	T	C	0.0547855	0.00760851	5.99686e-13
rs60570899	19	45136648	0.189861	C	G	0.0542863	0.00759426	8.78385e-13
rs13344267	19	45137012	0.189861	A	C	0.0537676	0.00756698	1.19834e-12
rs13344893	19	45138246	0.189861	C	T	0.0531274	0.00756639	2.19496e-12
rs10460182	19	45140601	0.189861	G	C	0.0542363	0.00757005	7.80206e-13
rs10419829	19	45142851	0.249503	G	T	0.0600137	0.00708073	2.33799e-17
rs7260482	19	45143942	0.26839	A	C	0.0631962	0.0068823	4.21492e-20
rs7250339	19	45145612	0.249503	A	G	0.0598001	0.00708102	3.03699e-17
rs7255066	19	45146103	0.269384	T	C	0.0626658	0.00686049	6.58215e-20
rs2301274	19	45146402	0.249503	T	C	0.0596263	0.00708019	3.71477e-17
rs2301275	19	45146629	0.205765	A	G	0.0523309	0.00767464	9.18811e-12
rs11540084	19	45147340	0.203777	G	T	0.0516074	0.00765237	1.54111e-11
rs10426401	19	45147719	0.246521	T	G	0.0600699	0.00710349	2.75804e-17
rs28483039	19	45149235	0.247515	G	A	0.0599795	0.00710364	3.08026e-17
rs56261258	19	45149613	0.116302	C	T	-0.102625	0.00960581	1.21428e-26
rs8111946	19	45152394	0.265408	T	C	0.0629966	0.00690844	7.59708e-20
rs10410915	19	45154340	0.186879	G	A	0.048666	0.00765958	2.10329e-10
rs203707	19	45157488	0.266402	A	G	0.0623908	0.00693209	2.25133e-19
rs10410651	19	45160896	0.265408	T	C	0.0630288	0.0069328	9.7773e-20
rs203709	19	45161566	0.269384	T	A	0.0636187	0.00692742	4.16882e-20
rs35385129	19	45162189	0.148111	C	A	0.046471	0.00845375	3.86111e-08
rs714948	19	45165912	0.117296	C	A	-0.102553	0.00950817	4.01845e-27
rs111780744	19	45166951	0.0228628	C	T	-0.159647	0.0252135	2.42305e-10
rs28807203	19	45173951	0.0407555	A	C	0.0805167	0.0147644	4.94033e-08
rs142034848	19	45176557	0.0119284	A	G	-0.418833	0.0298609	1.07825e-44
rs2919845	19	45181228	0.232604	A	G	0.0543796	0.00745646	3.03246e-13
rs2289494	19	45186965	0.239563	G	C	0.0498853	0.00740772	1.64791e-11
rs2289495	19	45187302	0.262425	T	C	0.0451449	0.00723707	4.43155e-10
rs2965156	19	45188429	0.474155	G	C	0.0369247	0.00609438	1.37125e-09
rs8104660	19	45191509	0.0347913	C	T	0.0923257	0.0156523	3.66747e-09
rs62119330	19	45192321	0.0347913	A	G	0.0917766	0.0156424	4.43274e-09
rs11879980	19	45193967	0.0347913	T	C	0.0950296	0.0148803	1.69975e-10
rs16979372	19	45195313	0.0347913	T	G	0.0924509	0.0155574	2.80573e-09
rs2965158	19	45195928	0.014911	T	C	0.218702	0.0283334	1.17353e-14
rs76670936	19	45196581	0.0874751	G	A	0.0687925	0.0118935	7.29312e-09
rs151330717	19	45196964	0.0119284	G	A	0.187479	0.0255136	2.00882e-13
rs62120565	19	45197027	0.0785288	A	C	0.06945	0.011843	4.51211e-09
rs10422568	19	45198477	0.0347913	C	T	0.0947074	0.0157248	1.7141e-09
rs2965162	19	45198936	0.166998	C	T	0.0587169	0.00935023	3.39156e-10
rs73035597	19	45199524	0.22664	C	T	-0.0567753	0.00754639	5.33248e-14
rs75974038	19	45200210	0.0347913	C	T	0.0940793	0.0158507	2.93245e-09
rs2965163	19	45200526	0.385686	G	A	0.0450282	0.00647064	3.43057e-12
rs12150984	19	45202027	0.280318	G	A	-0.0461413	0.00724874	1.94754e-10
rs2965164	19	45202052	0.354871	C	T	0.0443117	0.0065024	9.44834e-12
rs10403682	19	45207828	0.15507	C	T	-0.0741025	0.00849777	2.77647e-18
rs61744497	19	45211407	0.15507	C	T	-0.0759301	0.0085567	7.07206e-19
rs62120575	19	45215050	0.218688	C	G	-0.0515583	0.00742835	3.90031e-12
rs111278137	19	45215081	0.0139165	G	A	0.176749	0.0259428	9.55674e-12
rs58522314	19	45216649	0.104374	A	G	0.0579462	0.0099721	6.21612e-09
rs55730055	19	45217194	0.157058	C	T	-0.0765142	0.00857402	4.49941e-19
rs9749091	19	45217286	0.104374	A	G	0.0594497	0.00999236	2.68936e-09
rs4600571	19	45217477	0.104374	A	T	0.0587315	0.0100144	4.50003e-09
rs4516335	19	45217655	0.104374	T	C	0.0598599	0.00999471	2.10934e-09
rs9973228	19	45217680	0.104374	G	A	0.0588393	0.0100167	4.25006e-09
rs4398192	19	45217737	0.104374	A	G	0.0587857	0.0100163	4.38454e-09
rs74862042	19	45217784	0.158052	A	C	-0.0757552	0.00858995	1.15444e-18
rs78358160	19	45217789	0.158052	G	C	-0.0765053	0.00859154	5.35189e-19
rs76419583	19	45217859	0.158052	T	C	-0.0749614	0.00858387	2.4839e-18
rs75573995	19	45217910	0.158052	A	G	-0.0752878	0.0085879	1.83924e-18
rs75972892	19	45217990	0.157058	T	C	-0.075493	0.00858947	1.50866e-18
rs77229005	19	45218266	0.158052	A	G	-0.0755011	0.00859877	1.62811e-18
rs77751556	19	45218292	0.158052	T	C	-0.0766009	0.00859794	5.13945e-19
rs1137572	19	45218971	0.159046	C	A	-0.0760563	0.00860857	1.00143e-18
rs1137571	19	45219011	0.159046	G	A	-0.0754407	0.00861908	2.08219e-18
rs3201345	19	45219015	0.159046	C	T	-0.0753824	0.00861924	2.21391e-18
rs57172082	19	45219369	0.158052	C	T	-0.0763735	0.00861454	7.60608e-19
rs60248451	19	45219462	0.158052	T	A	-0.0761726	0.00861526	9.43656e-19
rs74561933	19	45219486	0.158052	C	G	-0.0761999	0.00861567	9.20696e-19
rs113670196	19	45219634	0.158052	G	C	-0.0765182	0.00861837	6.77629e-19
rs11881756	19	45220896	0.102386	T	C	0.0881019	0.0102056	5.99061e-18
rs56198711	19	45221537	0.154076	C	T	-0.0783011	0.00869291	2.10868e-19
rs79638902	19	45221767	0.150099	C	T	-0.0861308	0.00894021	5.73966e-22
rs73037426	19	45222789	0.168986	G	C	-0.0986997	0.00918162	5.94542e-27
rs4802235	19	45224836	0.318091	G	T	0.0460963	0.00705938	6.58611e-11
rs2965109	19	45225345	0.389662	C	T	0.0644559	0.00646243	1.98221e-23
rs2927487	19	45225973	0.194831	G	C	0.0941048	0.00807714	2.27428e-31
rs150820726	19	45227155	0.0198807	A	T	-0.228431	0.0306078	8.44744e-14
rs7254776	19	45227742	0.38171	T	C	0.066091	0.00649819	2.68031e-24
rs10422350	19	45228502	0.337972	A	C	0.0440215	0.00693722	2.21417e-10
rs2927488	19	45231478	0.284294	G	A	0.05891	0.00716938	2.08851e-16
rs1551891	19	45231821	0.0656064	G	A	0.101628	0.0113328	3.03024e-19
rs62117160	19	45232161	0.0258449	G	A	0.191283	0.0176134	1.78538e-27
rs8104548	19	45233343	0.198807	G	A	0.0958492	0.0077683	5.61918e-35
rs62117161	19	45233385	0.0656064	A	G	0.103677	0.0113934	9.05518e-20
rs8104467	19	45233489	0.297217	A	G	0.037498	0.00669145	2.09622e-08
rs186110295	19	45233503	0.0168986	G	T	-0.266218	0.0293944	1.34387e-19
rs111252495	19	45233604	0.284294	C	T	0.05854	0.00717816	3.48343e-16
rs8108110	19	45234124	0.296223	A	G	0.0394559	0.00671397	4.1856e-09
rs2965105	19	45234465	0.2833	A	C	0.0583702	0.00717746	4.20751e-16
rs80307900	19	45235202	0.0705765	T	C	0.079106	0.013582	5.73387e-09
rs2965102	19	45235949	0.284294	G	T	0.059842	0.00719613	9.10904e-17
rs56978169	19	45236126	0.284294	G	T	0.0593249	0.00717305	1.33368e-16
rs17658713	19	45236702	0.284294	A	G	0.059781	0.00717428	7.90288e-17
rs2927434	19	45236729	0.204771	T	C	0.111706	0.00757983	3.71342e-49
rs2965101	19	45237812	0.350895	T	C	0.083155	0.00649472	1.56768e-37
rs2927436	19	45239185	0.351889	A	G	0.0832413	0.00651804	2.38345e-37
rs62117162	19	45239536	0.0666004	C	A	0.0979747	0.0112866	3.93646e-18
rs56702353	19	45239568	0.285288	G	A	0.0609189	0.00719583	2.54249e-17
rs59170622	19	45239646	0.285288	G	A	0.0601955	0.00717167	4.71835e-17
rs77775146	19	45240189	0.285288	A	G	0.0606689	0.00717215	2.69809e-17
rs17728272	19	45240371	0.285288	C	T	0.060323	0.00719517	5.12385e-17
rs55923289	19	45240584	0.126243	T	C	-0.114215	0.0089999	6.66103e-37
rs2927437	19	45241638	0.198807	A	G	0.121692	0.00756567	3.25984e-58
rs2927438	19	45242107	0.229622	A	G	0.110773	0.00718794	1.38138e-53
rs1531517	19	45242173	0.054672	G	A	0.11597	0.0123922	8.09854e-21
rs2927439	19	45242740	0.360835	A	G	0.0916322	0.00650173	4.16324e-45
rs4803748	19	45247048	0.428429	C	T	0.101294	0.00647389	3.50637e-55
rs4803749	19	45247141	0.303181	G	C	0.0726472	0.00707671	1.00612e-24
rs4803750	19	45247627	0.05666	A	G	0.12469	0.0126185	5.0061e-23
rs115785198	19	45249509	0.055666	C	T	0.131421	0.0129308	2.88728e-24
rs12459810	19	45249661	0.277336	C	T	-0.104724	0.00711192	4.44465e-49
rs2965169	19	45251156	0.437376	A	C	0.103893	0.00649229	1.22644e-57
rs7257231	19	45252439	0.303181	T	A	0.0727264	0.00714912	2.62309e-24
rs8100239	19	45253104	0.392644	T	A	0.0788071	0.0067684	2.47996e-31
rs8100197	19	45253582	0.322068	G	A	0.0790568	0.00707699	5.65612e-29
rs8103315	19	45254168	0.139165	C	A	-0.142935	0.00885537	1.31245e-58
rs111677968	19	45254983	0.0407555	C	T	0.135378	0.0236146	9.8793e-09
rs62117205	19	45255266	0.05666	T	C	0.138398	0.0131576	7.09978e-26
rs62117206	19	45255679	0.05666	G	C	0.139361	0.0131829	4.04764e-26
rs1979377	19	45259002	0.0765408	A	C	0.0797801	0.0133426	2.24025e-09
rs10425556	19	45259871	0.0695825	G	T	0.0866888	0.0144595	2.0314e-09
rs11880948	19	45260554	0.0457256	T	C	0.102317	0.0186103	3.8437e-08
rs34967149	19	45261705	0.0457256	C	T	0.103236	0.0186343	3.0234e-08
rs2006134	19	45263628	0.054672	C	T	0.0902536	0.0163211	3.20462e-08
rs10416720	19	45264110	0.0775348	G	T	0.0824175	0.0132714	5.29364e-10
rs2965133	19	45265435	0.0785288	A	T	0.0809335	0.0132299	9.50679e-10
rs2927455	19	45267258	0.0705765	T	C	0.0849368	0.0142144	2.29498e-09
rs139326841	19	45269725	0.0238569	T	C	-0.32413	0.0253836	2.43346e-37
rs2927451	19	45272126	0.083499	A	G	0.0703989	0.012788	3.68991e-08
rs140414737	19	45274072	0.0248509	C	T	0.191212	0.0332413	8.80692e-09
rs2965143	19	45279340	0.0894632	A	G	0.0704426	0.0122449	8.77605e-09
rs35106910	19	45284266	0.0526839	A	C	0.0956449	0.0167958	1.23674e-08
rs2927448	19	45287849	0.0874751	G	T	0.0655114	0.0118935	3.62614e-08
rs2927447	19	45290477	0.105368	T	C	0.0673927	0.0113146	2.58071e-09
rs113330691	19	45295886	0.0228628	G	A	0.193835	0.0198962	1.98918e-22
rs112450640	19	45296364	0.0159046	G	A	0.269168	0.0268344	1.11752e-23
rs3208856	19	45296806	0.0228628	C	T	0.193991	0.0197764	1.02784e-22
rs1903830	19	45297878	0.0974155	T	C	0.0659784	0.0119659	3.50987e-08
rs2889414	19	45297928	0.319085	A	G	-0.0846015	0.00742909	4.80609e-30
rs10420519	19	45298461	0.0238569	G	T	0.210527	0.0199475	4.86492e-26
rs76560105	19	45299199	0.0238569	G	T	0.211437	0.0200679	5.88818e-26
rs28534944	19	45301088	0.0914513	T	C	0.0917495	0.0135963	1.49789e-11
rs116306535	19	45301112	0.0805169	C	T	0.0883261	0.014389	8.33436e-10
rs78253907	19	45301145	0.0805169	C	A	0.0884985	0.0144178	8.34817e-10
rs116700999	19	45301160	0.0805169	A	G	0.0880674	0.0144006	9.62334e-10
rs116490343	19	45301394	0.0805169	C	T	0.087003	0.0143723	1.41709e-09
rs2965113	19	45301924	0.127237	T	C	0.108887	0.0104488	1.98796e-25
rs2967669	19	45301942	0.127237	A	G	0.1089	0.0104497	1.98111e-25
rs148933445	19	45302504	0.0149105	G	A	0.311835	0.0262447	1.47091e-32
rs2965112	19	45302513	0.128231	A	G	0.11037	0.0103991	2.58159e-26
rs73572003	19	45302665	0.0984095	T	G	0.0748429	0.0121505	7.29082e-10
rs111794050	19	45302778	0.0298211	A	G	0.190703	0.0191465	2.27596e-23
rs143695016	19	45302840	0.0984095	C	T	0.0724119	0.0120825	2.05843e-09
rs2967668	19	45302951	0.126243	A	G	0.137042	0.0102522	9.41481e-41
rs10418198	19	45303311	0.028827	G	A	0.212605	0.0198336	8.251e-27
rs73572006	19	45303334	0.0805169	A	G	0.0899674	0.0142998	3.14429e-10
rs139246905	19	45304028	0.0914513	T	C	0.104943	0.0140091	6.83148e-14
rs10408993	19	45305753	0.0805169	T	C	0.0918459	0.0142973	1.32743e-10
rs140086276	19	45306923	0.0805169	A	G	0.0922564	0.014309	1.13751e-10
rs1075643	19	45306954	0.0815109	T	A	0.0846132	0.0139474	1.30647e-09
rs76381342	19	45307501	0.0805169	T	C	0.0915401	0.0143441	1.75114e-10
rs112619823	19	45309634	0.028827	G	A	0.215149	0.0195411	3.41662e-28
rs76076688	19	45309786	0.0805169	T	A	0.092639	0.0143486	1.073e-10
rs2927479	19	45309886	0.0805169	G	T	0.0923421	0.0142792	1.00045e-10
rs28399596	19	45310035	0.028827	G	A	0.215039	0.0195392	3.5949e-28
rs140824606	19	45311084	0.0258449	G	A	-0.334129	0.0221773	2.69923e-51
rs8113171	19	45311747	0.0805169	G	C	0.0937864	0.0143409	6.16104e-11
rs2967671	19	45312036	0.0805169	C	G	0.0920247	0.0142619	1.10017e-10
rs2927477	19	45313715	0.133201	T	C	0.106866	0.0104736	1.91534e-24
rs28399607	19	45314324	0.0457256	T	C	-0.0953699	0.0164436	6.63855e-09
rs7249750	19	45314767	0.0805169	C	T	0.0930328	0.0143233	8.29121e-11
rs28399653	19	45315445	0.028827	G	A	0.214046	0.0197579	2.39099e-27
rs28399654	19	45316588	0.028827	G	A	0.211848	0.0196423	4.03949e-27
rs3810141	19	45316804	0.0815109	C	T	0.0948683	0.0144088	4.57727e-11
rs3810140	19	45316807	0.0805169	C	T	0.0941199	0.0144104	6.5168e-11
rs2968180	19	45318153	0.0994036	G	T	0.0654362	0.0116787	2.10622e-08
rs28399657	19	45318351	0.028827	A	G	0.217004	0.0196356	2.15368e-28
rs118147862	19	45319631	0.026839	G	A	0.288162	0.0177448	2.66133e-59
rs111548706	19	45320386	0.0785288	C	T	0.0965743	0.0147433	5.73832e-11
rs1135062	19	45322744	0.300199	A	G	0.0575124	0.00724732	2.0934e-15
rs28399635	19	45323243	0.184891	A	G	0.0515986	0.00844794	1.00988e-09
rs28399637	19	45324138	0.322068	G	A	-0.198881	0.00689304	4.73075e-183
rs28399664	19	45324756	0.0168986	C	G	-0.650297	0.0219195	2.02034e-193
rs8112196	19	45325309	0.361829	G	A	0.0565417	0.00627682	2.09811e-19
rs6509172	19	45325391	0.368787	C	T	0.0545578	0.00625305	2.66189e-18
rs8113311	19	45325738	0.279324	T	G	-0.104088	0.00680509	8.1721e-53
rs10406338	19	45326217	0.34493	T	C	-0.152611	0.00628896	4.43781e-130
rs10405693	19	45326664	0.34493	C	T	-0.151959	0.00628449	3.60981e-129
rs1871045	19	45326768	0.361829	C	T	0.0530508	0.00619544	1.10089e-17
rs10412413	19	45327309	0.34493	C	T	-0.151841	0.00626142	6.5614e-130
rs4803759	19	45327459	0.285288	T	C	-0.108578	0.00669768	4.19819e-59
rs58132661	19	45328367	0.34493	A	T	-0.151381	0.00628347	3.03157e-128
rs58826447	19	45328379	0.34493	T	A	-0.15181	0.00640165	2.57449e-124
rs58446550	19	45328380	0.34493	C	A	-0.151707	0.00640208	3.91506e-124
rs10402271	19	45329214	0.34493	T	G	-0.150611	0.00623988	1.02545e-128
rs10402524	19	45329344	0.34493	T	C	-0.150971	0.00623989	2.54475e-129
rs78986976	19	45329438	0.0487078	G	A	0.122289	0.0149386	2.69777e-16
rs6509173	19	45330999	0.172962	A	G	-0.0473778	0.00774836	9.682e-10
rs112262807	19	45331686	0.240557	C	T	0.0693411	0.00734617	3.76072e-21
rs11669415	19	45331994	0.225646	G	A	0.0694056	0.00751815	2.66278e-20
rs34978331	19	45332841	0.225646	T	C	0.0704655	0.00745015	3.13095e-21
rs1551890	19	45333132	0.225646	T	G	0.0707157	0.0074521	2.32442e-21
rs4803760	19	45333834	0.177932	T	C	-0.0502591	0.0077621	9.48509e-11
rs2972555	19	45334013	0.217694	C	G	0.0737772	0.00749892	7.69396e-23
rs56394238	19	45335676	0.478131	A	G	-0.112709	0.00619638	6.25065e-74
rs7359852	19	45336035	0.328032	T	C	-0.148247	0.00645547	1.05427e-116
rs3021439	19	45336443	0.321074	G	A	-0.147724	0.00645532	6.69424e-116
rs35741123	19	45336599	0.125249	T	C	0.0737511	0.0102783	7.20836e-13
rs2927480	19	45337385	0.322068	G	C	-0.147603	0.00645401	9.26321e-116
rs11667241	19	45337504	0.33002	G	C	-0.138727	0.00640872	6.55107e-104
rs11667253	19	45337737	0.292247	C	T	-0.106722	0.00683299	5.4355e-55
rs12976241	19	45337863	0.297217	T	C	-0.107112	0.00681672	1.2301e-55
rs147711004	19	45337918	0.028827	G	A	-0.565316	0.0154366	1.2894e-293
rs4369782	19	45338220	0.292247	A	G	-0.106729	0.00683332	5.41462e-55
rs4605275	19	45338493	0.292247	T	C	-0.108057	0.00683337	2.52427e-56
rs73048288	19	45338523	0.323062	G	C	-0.147539	0.00647614	6.9135e-115
rs34374273	19	45338895	0.125249	G	A	0.0744611	0.0103019	4.90577e-13
rs2972561	19	45340021	0.011928	C	T	-0.165908	0.0285044	5.86984e-09
rs2927482	19	45340138	0.298211	G	A	-0.106872	0.00681414	1.94843e-55
rs10409208	19	45340728	0.358847	T	C	0.0620266	0.00636979	2.0838e-22
rs73048293	19	45340736	0.323062	G	A	-0.148413	0.00647288	2.42022e-116
rs35182466	19	45341282	0.371769	T	C	0.0404523	0.0063489	1.87132e-10
rs12462274	19	45341540	0.324056	A	G	-0.147885	0.00647753	2.28586e-115
rs11666665	19	45341797	0.371769	G	A	0.0447911	0.0065875	1.05047e-11
rs12459575	19	45341904	0.324056	G	A	-0.148651	0.0064739	1.12925e-116
rs10407439	19	45341948	0.292247	A	G	-0.115555	0.00689506	4.86511e-63
rs4803761	19	45342114	0.329026	A	G	-0.14756	0.00651093	1.02699e-113
rs10408472	19	45342124	0.378728	G	A	0.0431736	0.00635463	1.09039e-11
rs4803762	19	45342161	0.32505	G	A	-0.139293	0.00659363	4.64989e-99
rs4239533	19	45342241	0.292247	A	G	-0.103742	0.00683094	4.31038e-52
rs73572039	19	45342630	0.125249	C	T	0.0745614	0.0103081	4.7136e-13
rs1466435	19	45342815	0.0417495	G	C	0.127757	0.0169302	4.48383e-14
rs55840414	19	45343579	0.12326	G	A	0.101228	0.00983418	7.54132e-25
rs2972562	19	45343664	0.158052	A	G	0.0717687	0.0096443	9.95023e-14
rs28615360	19	45344722	0.0168986	G	A	-0.356979	0.0269701	5.43041e-40
rs61642202	19	45345283	0.0129225	A	C	-0.483328	0.0306783	6.37485e-56
rs2199576	19	45345708	0.159046	G	A	-0.0547656	0.00833674	5.0591e-11
rs2376518	19	45345773	0.151093	C	T	0.0798993	0.00978873	3.28512e-16
rs111371860	19	45345787	0.0755467	A	T	0.188247	0.0139494	1.67314e-41
rs1985096	19	45346551	0.156064	A	T	-0.0489687	0.00837843	5.0773e-09
rs1001611	19	45346768	0.383698	G	A	0.0711286	0.00626498	7.13628e-30
rs11668738	19	45347561	0.139165	T	G	-0.0873899	0.00841993	3.092e-25
rs4452060	19	45347911	0.457256	C	A	-0.0968458	0.00625317	4.21587e-54
rs10426423	19	45348253	0.375746	C	T	0.0710328	0.00626416	8.35669e-30
rs12162222	19	45348522	0.301193	G	T	-0.155901	0.00659637	1.7095e-123
rs77241309	19	45349177	0.082505	G	C	0.0796908	0.0111387	8.40178e-13
rs2927472	19	45349369	0.135189	T	C	-0.0975061	0.00877492	1.09798e-28
rs3810143	19	45349402	0.457256	T	C	-0.100887	0.0061855	8.34863e-60
rs2306149	19	45349963	0.368787	C	A	0.0732411	0.00641914	3.73602e-30
rs41289512	19	45351516	0.0308151	C	G	-0.53978	0.0143954	1.04343e-307
rs1871047	19	45351746	0.383698	A	G	0.0713625	0.00623928	2.71215e-30
rs2972569	19	45351891	0.167992	A	G	-0.0593164	0.00817168	3.90631e-13
rs1871046	19	45351937	0.382704	T	C	0.0818682	0.00647819	1.31157e-36
rs7255063	19	45352419	0.384692	G	C	0.0721967	0.00628254	1.45326e-30
rs12974942	19	45352487	0.44831	A	T	-0.105983	0.0062894	1.02982e-63
rs4802240	19	45352804	0.383698	C	T	0.0724659	0.00628123	8.59735e-31
rs1531516	19	45353261	0.384692	C	G	0.0730137	0.00630884	5.6319e-31
rs57537848	19	45354044	0.464215	T	G	0.103017	0.00619772	4.85114e-62
rs2972566	19	45354238	0.152087	G	C	-0.0965196	0.00850444	7.4742e-30
rs11666329	19	45354296	0.464215	A	G	0.102948	0.00624349	4.41311e-61
rs76205446	19	45355267	0.0129225	T	A	-0.481081	0.0298043	1.30731e-58
rs149661872	19	45355288	0.0129225	C	T	-0.498474	0.0302207	4.01922e-61
rs2972559	19	45355721	0.271372	C	G	-0.180213	0.00692469	2.5994e-149
rs4802241	19	45355743	0.148111	A	C	0.0914838	0.00858383	1.60529e-26
rs2972558	19	45356141	0.293241	C	T	-0.112486	0.00678012	8.15855e-62
rs73050205	19	45356464	0.266402	T	A	-0.182484	0.00693787	1.79278e-152
rs10421035	19	45356674	0.266402	A	G	0.0432857	0.00742457	5.54067e-09
rs35396326	19	45357003	0.291252	C	G	-0.167842	0.00681456	6.03767e-134
rs4803763	19	45357291	0.269384	G	C	-0.180575	0.00693017	1.13819e-149
rs4803764	19	45357377	0.267396	T	C	-0.18281	0.00693945	6.07711e-153
rs2927468	19	45357939	0.44831	A	G	-0.141421	0.00639145	1.75693e-108
rs143459034	19	45358026	0.0129225	C	T	-0.476525	0.0297232	7.62784e-58
rs7249933	19	45358235	0.150099	C	T	0.0864427	0.00988828	2.29147e-18
rs10410835	19	45358353	0.447316	T	C	-0.14514	0.00645228	4.70836e-112
rs56317818	19	45359586	0.263419	C	T	-0.183763	0.00693691	1.24175e-154
rs41289514	19	45359667	0.0129225	A	G	-0.486153	0.0297638	5.68548e-60
rs12462573	19	45359706	0.264414	G	A	-0.183124	0.00693983	1.91255e-153
rs8112526	19	45360762	0.099404	A	G	0.0722433	0.0099218	3.30686e-13
rs440277	19	45361224	0.361829	G	A	0.0814827	0.00667583	2.90068e-34
rs411920	19	45361632	0.409543	T	C	-0.0862515	0.00618787	3.68024e-44
rs365653	19	45361646	0.0914513	A	G	0.178441	0.0101812	8.98321e-69
rs418227	19	45361825	0.409543	T	C	-0.0863177	0.0061877	3.15037e-44
rs417193	19	45361960	0.409543	T	C	-0.0851701	0.0061878	4.18497e-43
rs2436474	19	45362269	0.409543	G	T	-0.0861568	0.00618677	4.40541e-44
rs377702	19	45362667	0.409543	G	A	-0.0861684	0.00618634	4.23289e-44
rs454050	19	45362809	0.409543	C	A	-0.0862705	0.00618629	3.35337e-44
rs387369	19	45363254	0.409543	G	A	-0.0863512	0.00618623	2.78776e-44
rs403155	19	45363299	0.407555	C	T	-0.0854223	0.0062096	4.65614e-43
rs12610257	19	45363392	0.151093	C	T	0.103131	0.00827563	1.20343e-35
rs12978931	19	45363700	0.16998	A	G	0.107231	0.00798936	4.5107e-41
rs384973	19	45363791	0.409543	T	G	-0.0862143	0.00618583	3.75427e-44
rs411856	19	45364623	0.409543	C	T	-0.0863799	0.0061829	2.35047e-44
rs395683	19	45364782	0.409543	A	G	-0.09119	0.00622795	1.51405e-48
rs395710	19	45364815	0.409543	A	G	-0.08752	0.0062057	3.63131e-45
rs555608	19	45365072	0.409543	A	G	-0.0863585	0.00618232	2.42298e-44
rs2436475	19	45365248	0.409543	T	C	-0.0864386	0.006182	1.99874e-44
rs146275714	19	45365447	0.0218688	G	A	-0.609492	0.0170981	2.6399e-278
rs11669109	19	45365476	0.409543	T	C	-0.0924466	0.00624939	1.62801e-49
rs12980613	19	45365604	0.409543	A	G	-0.0835713	0.00634076	1.14358e-39
rs12980631	19	45365641	0.409543	A	C	-0.091034	0.00622665	2.09209e-48
rs11665829	19	45365817	0.409543	G	A	-0.0863229	0.00618048	2.47749e-44
rs548011	19	45365961	0.409543	A	G	-0.0864199	0.00618068	2.00042e-44
rs415637	19	45366178	0.409543	G	A	-0.0879719	0.00620361	1.20556e-45
rs416116	19	45366345	0.410537	G	A	-0.0874278	0.00620538	4.43624e-45
rs403729	19	45366410	0.410537	G	C	-0.0870571	0.00618089	4.70487e-45
rs521629	19	45366603	0.410537	G	A	-0.0870689	0.00618094	4.58667e-45
rs520566	19	45366656	0.410537	G	A	-0.0882338	0.00620398	6.67995e-46
rs519825	19	45366779	0.410537	T	C	-0.0871061	0.00618105	4.22617e-45
rs376938	19	45366830	0.410537	A	G	-0.0889683	0.00620393	1.21925e-46
rs73050216	19	45367502	0.152087	G	C	0.102718	0.00829429	3.1857e-35
rs8105340	19	45367777	0.117296	C	T	0.0728239	0.00947996	1.56768e-14
rs520283	19	45368082	0.410537	C	A	-0.0880502	0.00620511	1.05745e-45
rs112422902	19	45369203	0.0367793	G	A	0.273995	0.0192446	5.36418e-46
rs41290098	19	45370278	0.150099	A	T	0.103689	0.00875716	2.40971e-32
rs384653	19	45370335	0.437376	G	A	0.0336613	0.00617138	4.91347e-08
rs511825	19	45370554	0.407555	T	C	0.0900021	0.00621024	1.35096e-47
rs564724	19	45370649	0.397614	A	G	0.0882219	0.00621153	8.78773e-46
rs510297	19	45370673	0.397614	C	A	0.0914263	0.00621089	4.77331e-49
rs12610605	19	45370838	0.154076	G	A	0.101331	0.00812913	1.15575e-35
rs416041	19	45370854	0.398608	G	A	0.0885851	0.00618928	1.82397e-46
rs41290100	19	45370941	0.0258449	C	T	0.162919	0.023997	1.12804e-11
rs41290102	19	45371188	0.0198807	C	T	0.174642	0.0249939	2.80033e-12
rs71352236	19	45375413	0.0248509	G	A	0.149068	0.0266618	2.25676e-08
rs393584	19	45377334	0.312127	G	A	0.0796356	0.00645046	5.13685e-35
rs41290108	19	45377842	0.0248509	G	C	0.128154	0.0187626	8.47533e-12
rs34278513	19	45378144	0.112326	C	T	-0.0888309	0.00940824	3.66366e-21
rs11665676	19	45378719	0.0477137	C	T	0.13489	0.0141434	1.46552e-21
rs387976	19	45379060	0.314115	A	C	0.0780521	0.00645162	1.08127e-33
rs412776	19	45379516	0.112326	G	A	-0.0931511	0.00939264	3.49543e-23
rs73050293	19	45379746	0.15507	A	G	0.104453	0.00965278	2.73785e-27
rs11667640	19	45379791	0.0596421	C	T	0.111491	0.0125368	5.94305e-19
rs3865427	19	45380961	0.111332	C	A	-0.093715	0.0094897	5.31969e-23
rs11668861	19	45380970	0.455268	G	T	0.107783	0.00613991	5.49634e-69
rs150639620	19	45381292	0.0487078	G	T	0.14185	0.0143851	6.14652e-23
rs6859	19	45382034	0.440358	A	G	0.168534	0.00605868	2.70415e-170
rs41290120	19	45382675	0.0298211	G	A	0.309723	0.0164286	2.79619e-79
rs406456	19	45382717	0.412525	G	A	0.123885	0.00625829	3.26836e-87
rs3852860	19	45382966	0.414513	C	T	0.119732	0.00632157	5.31036e-80
rs11669338	19	45382984	0.0745527	T	G	0.139584	0.0114845	5.45505e-34
rs11673139	19	45383037	0.0745527	A	T	0.139577	0.0114856	5.57566e-34
rs3852861	19	45383061	0.416501	G	T	0.120161	0.00632343	1.62775e-80
rs71352237	19	45383079	0.110338	T	C	-0.0959915	0.00955433	9.47969e-24
rs34224078	19	45383115	0.112326	A	G	-0.0967714	0.00955877	4.33143e-24
rs35879138	19	45383139	0.112326	T	A	-0.0967334	0.00955499	4.32994e-24
rs148303016	19	45383830	0.0477137	C	T	0.137373	0.0143092	7.96676e-22
rs406315	19	45384116	0.395626	G	A	0.122122	0.00635626	2.88366e-82
rs113743631	19	45384700	0.0238569	G	A	0.145575	0.0248194	4.48116e-09
rs144261139	19	45385356	0.0159046	C	A	-0.544048	0.0278768	8.00346e-85
rs3745150	19	45385759	0.43837	G	C	0.16245	0.00646223	1.89148e-139
rs147636938	19	45386634	0.0347913	C	T	-0.541782	0.0178811	1.17874e-201
rs283808	19	45387034	0.0377734	A	C	0.17445	0.0166284	9.49679e-26
rs283809	19	45387057	0.0377734	A	G	0.174436	0.0166293	9.63584e-26
rs12972156	19	45387459	0.135189	C	G	-0.517124	0.00768122	0
rs12972970	19	45387596	0.135189	G	A	-0.517097	0.00767932	0
rs34342646	19	45388130	0.139165	G	A	-0.512365	0.00765149	0
rs283810	19	45388241	0.0725646	T	G	-0.142645	0.0120252	1.86093e-32
rs283813	19	45389174	0.0765408	T	A	-0.136726	0.011846	8.10862e-31
rs283814	19	45389224	0.085487	A	G	-0.147137	0.0126441	2.68015e-31
rs7254892	19	45389596	0.0308151	G	A	0.232198	0.0190469	3.47868e-34
rs117310449	19	45393516	0.0149105	C	T	-0.539855	0.0276238	4.72272e-85
rs76692773	19	45394211	0.11332	C	T	0.136093	0.0115239	3.47985e-32
rs71352238	19	45394336	0.133201	T	C	-0.516405	0.00761779	0
rs157580	19	45395266	0.375746	G	A	-0.220333	0.00634426	2.82283e-264
rs2075649	19	45395330	0.415507	A	G	0.164128	0.00635152	3.09417e-147
rs2075650	19	45395619	0.131213	A	G	-0.518778	0.00761783	0
rs34095326	19	45395844	0.0984095	G	A	-0.485478	0.00861077	0
rs34404554	19	45395909	0.131213	C	G	-0.520076	0.00763915	0
rs11556505	19	45396144	0.131213	C	T	-0.520167	0.0076397	0
rs157584	19	45396899	0.492048	T	C	0.12004	0.00612002	1.16634e-85
rs77301115	19	45396973	0.0347913	G	A	-0.535251	0.0173633	1.15568e-208
rs1160983	19	45397229	0.0298211	G	A	0.241419	0.019341	9.33477e-36
rs112849259	19	45397307	0.0328032	C	T	-0.530703	0.0175213	1.59937e-201
rs157585	19	45397512	0.480119	A	C	0.13068	0.00614412	2.19675e-100
rs116881820	19	45397952	0.0328032	T	C	-0.500285	0.017101	3.90091e-188
rs157588	19	45398264	0.480119	C	T	0.130971	0.0061446	8.27187e-101
rs11668327	19	45398633	0.156064	G	C	0.207682	0.00884535	6.64356e-122
rs157590	19	45398716	0.489066	A	C	0.133464	0.00614873	1.80257e-104
rs79398853	19	45398785	0.0328032	C	T	-0.530748	0.0175015	5.21176e-202
rs2238681	19	45398817	0.407555	C	T	0.180505	0.00630533	3.06663e-180
rs75687619	19	45399344	0.0328032	G	T	-0.531618	0.0175024	1.20957e-202
rs76366838	19	45399896	0.0347913	G	A	-0.530127	0.0174212	2.19944e-203
rs114536010	19	45400725	0.0328032	C	T	-0.532031	0.0174781	1.63526e-203
rs61679753	19	45400747	0.0298211	T	A	0.227434	0.0190533	7.61273e-33
rs8106922	19	45401666	0.408549	A	G	0.183842	0.00628307	3.36183e-188
rs118170342	19	45401868	0.0407555	T	C	-0.396057	0.0161393	5.53377e-133
rs34878901	19	45402477	0.407555	C	T	0.182577	0.00628049	8.46579e-186
rs35568738	19	45402718	0.0606362	G	C	0.147187	0.0136308	3.51246e-27
rs115881343	19	45403216	0.0328032	C	T	-0.535503	0.0172226	2.98255e-212
rs1160985	19	45403412	0.446322	C	T	0.202077	0.00617487	6.71418e-235
rs760136	19	45403858	0.446322	A	G	0.202114	0.00617562	6.31269e-235
rs1160984	19	45403924	0.0606362	C	T	0.145819	0.0137938	4.04543e-26
rs741780	19	45404431	0.44831	T	C	0.200526	0.00619995	1.7292e-229
rs117264457	19	45404432	0.0159046	G	A	0.149506	0.0241964	6.4562e-10
rs405697	19	45404691	0.265408	A	G	-0.167254	0.00720192	2.63649e-119
rs112019714	19	45404857	0.0328032	T	C	-0.536293	0.0172182	5.60207e-213
rs1038025	19	45404972	0.446322	T	C	0.202292	0.00619946	1.50728e-233
rs1038026	19	45405062	0.446322	A	G	0.202236	0.00619956	2.0666e-233
rs141864196	19	45405499	0.028827	G	A	0.165907	0.0213887	8.71449e-15
rs1305062	19	45405521	0.408549	G	C	0.181837	0.00630486	6.62329e-183
rs449647	19	45408564	0.16501	A	T	0.197995	0.00928715	7.5286e-101
rs769446	19	45408628	0.0785288	T	C	0.0919483	0.0124356	1.42492e-13
rs405509	19	45408836	0.484095	T	G	0.173687	0.00606731	3.12105e-180
rs440446	19	45409167	0.362823	C	G	-0.185894	0.00651449	4.25362e-179
rs769449	19	45410002	0.12326	G	A	-0.589855	0.00788474	0
rs769450	19	45410444	0.411531	G	A	0.184076	0.00634205	3.21156e-185
rs429358	19	45411941	0.15507	T	C	-0.643217	0.0075752	0
rs7412	19	45412079	0.0626243	C	T	0.275682	0.012431	5.73578e-109
rs1081105	19	45412955	0.0308151	A	C	-0.545014	0.0173617	2.63003e-216
rs1081106	19	45413366	0.106362	T	C	0.138897	0.0121463	2.78571e-30
rs75627662	19	45413576	0.185885	C	T	-0.372164	0.00718723	0
rs72654472	19	45414392	0.028827	G	T	0.165258	0.0213809	1.08188e-14
rs439401	19	45414451	0.380716	T	C	-0.194535	0.00649526	4.36861e-197
rs138235833	19	45415285	0.0407555	T	G	0.139017	0.0168168	1.37884e-16
rs10414043	19	45415713	0.124254	G	A	-0.589216	0.00792009	0
rs7256200	19	45415935	0.125249	G	T	-0.587901	0.00791272	0
rs72654437	19	45416099	0.0387674	G	A	0.144605	0.0202177	8.52947e-13
rs59325138	19	45416291	0.398608	C	T	0.176542	0.00646351	2.91501e-164
rs584007	19	45416478	0.377734	A	G	-0.195325	0.00653309	2.09812e-196
rs72654445	19	45417200	0.0109344	G	A	0.197876	0.031301	2.58654e-10
rs12691088	19	45418486	0.0218688	G	A	-0.652817	0.0181681	9.65997e-283
rs3925681	19	45421100	0.415507	G	A	0.20782	0.00675396	6.56906e-208
rs150966173	19	45421204	0.0318091	C	T	-0.540488	0.0173878	3.91466e-212
rs12721046	19	45421254	0.166004	G	A	-0.516359	0.00763918	0
rs12721056	19	45421744	0.33996	G	T	0.176244	0.00698573	1.91802e-140
rs1064725	19	45422561	0.0536779	T	G	0.139234	0.0162811	1.21073e-17
rs78959900	19	45423636	0.341948	G	A	0.176166	0.00700565	1.5539e-139
rs144311893	19	45423944	0.0149105	C	T	0.311022	0.0255025	3.2743e-34
rs157595	19	45425460	0.39662	A	G	-0.223922	0.00675783	9.23249e-241
rs141622900	19	45426792	0.0447316	G	A	0.279483	0.0160142	3.31114e-68
rs111789331	19	45427125	0.16501	T	A	-0.523798	0.00784552	0
rs139136389	19	45427136	0.0258449	C	T	0.214354	0.0293288	2.69843e-13
rs4803770	19	45427353	0.361829	C	G	0.185122	0.00694137	1.0658e-156
rs4803771	19	45427648	0.027833	C	G	0.176279	0.0275958	1.68171e-10
rs117664574	19	45427779	0.028827	C	G	0.161357	0.0220622	2.59874e-13
rs66626994	19	45428234	0.16501	G	A	-0.524781	0.00791812	0
rs4803772	19	45428459	0.336978	C	T	0.181619	0.00725034	1.75678e-138
rs71352239	19	45429543	0.301193	C	T	0.158965	0.00753395	7.9822e-99
rs60049679	19	45429708	0.111332	G	C	-0.352213	0.0132614	2.01215e-155
rs73033507	19	45431403	0.0238569	C	T	0.124503	0.0205525	1.37987e-09
rs8106813	19	45431658	0.486083	A	G	0.0833929	0.00749202	8.87373e-29
rs74924179	19	45436037	0.0238569	G	C	0.128241	0.0210913	1.19996e-09
rs7260330	19	45436216	0.424453	A	G	0.0525348	0.00780671	1.70326e-11
rs7254133	19	45438554	0.319085	C	T	-0.166755	0.00831648	1.97303e-89
rs4263041	19	45438643	0.28827	A	G	0.05276	0.00870911	1.37798e-09
rs73045691	19	45440529	0.329026	G	A	-0.0750375	0.00704767	1.79809e-26
rs34041051	19	45442349	0.329026	T	C	-0.0687589	0.00691681	2.76521e-23
rs35336243	19	45442519	0.33002	A	T	-0.0681751	0.006891	4.44882e-23
rs73045696	19	45443088	0.329026	G	C	-0.0671729	0.00685952	1.21064e-22
rs59859410	19	45443504	0.331014	A	G	-0.0662294	0.0068258	2.93323e-22
rs71352241	19	45443934	0.028827	G	T	0.124938	0.01994	3.71206e-10
rs112784534	19	45444566	0.331014	G	T	-0.0662604	0.00678601	1.60261e-22
rs79429216	19	45445517	0.0139165	G	A	-0.360673	0.0292614	6.57215e-35
rs12721109	19	45447221	0.0178926	G	A	0.25127	0.0236577	2.37785e-26
rs1132899	19	45448036	0.498012	T	C	-0.0430159	0.00614095	2.4739e-12
rs5167	19	45448465	0.366799	T	G	-0.0598734	0.00625106	9.88227e-22
rs9304644	19	45450033	0.44831	C	T	-0.0450233	0.00611161	1.74693e-13
rs10419086	19	45450852	0.0407555	A	G	0.0942246	0.0158568	2.81217e-09
rs4803774	19	45450872	0.449304	A	G	-0.0443048	0.00606409	2.7501e-13
rs10420434	19	45451190	0.0397614	G	A	0.0923023	0.0157517	4.63306e-09
rs7256684	19	45451442	0.451292	A	G	-0.0433208	0.0060384	7.27226e-13
rs1130742	19	45452812	0.290258	C	T	-0.0377766	0.00673138	1.99992e-08
rs7257468	19	45453144	0.451292	C	T	-0.0429513	0.00601569	9.34158e-13
rs7258345	19	45453151	0.451292	T	G	-0.0429156	0.00601575	9.75787e-13
rs7257476	19	45453165	0.451292	C	T	-0.0429047	0.00601571	9.88341e-13
rs12709889	19	45453239	0.290258	G	A	-0.0374983	0.00673014	2.52268e-08
rs10423208	19	45453656	0.451292	G	A	-0.0430746	0.00601239	7.81863e-13
rs10402642	19	45453878	0.451292	G	A	-0.0431118	0.00601236	7.47078e-13
rs7246900	19	45454236	0.451292	G	A	-0.0428661	0.00603599	1.23191e-12
rs11083752	19	45454363	0.451292	G	A	-0.0430751	0.0060124	7.81401e-13
rs7248162	19	45454686	0.451292	T	C	-0.0430862	0.00601231	7.70334e-13
rs7247227	19	45454759	0.451292	A	G	-0.0425598	0.00601229	1.45402e-12
rs892101	19	45455458	0.451292	G	A	-0.042615	0.00601228	1.36069e-12
rs7251501	19	45455706	0.451292	C	T	-0.0436867	0.00606047	5.65851e-13
rs7251503	19	45455715	0.451292	C	G	-0.0437142	0.00606048	5.47388e-13
rs190651665	19	45456103	0.026839	T	G	0.120143	0.0193249	5.06682e-10
rs4803779	19	45456497	0.451292	T	C	-0.0431962	0.00601246	6.74805e-13
rs4803780	19	45456628	0.451292	C	T	-0.0430398	0.00601226	8.14659e-13
rs3760625	19	45456941	0.451292	G	A	-0.0429841	0.00601224	8.71413e-13
rs3760626	19	45457105	0.451292	A	G	-0.0430414	0.00601215	8.12221e-13
rs3760627	19	45457180	0.451292	T	C	-0.0424732	0.00601211	1.61068e-12
rs3760628	19	45457225	0.451292	G	A	-0.0430459	0.00601234	8.09101e-13
rs66867801	19	45457293	0.454274	C	T	-0.042672	0.00601617	1.31347e-12
rs7259679	19	45457306	0.454274	C	T	-0.043242	0.00601635	6.60256e-13
rs66771331	19	45457319	0.454274	G	A	-0.0429326	0.00601449	9.45686e-13
rs73047641	19	45457377	0.45328	G	A	-0.042647	0.00601258	1.31274e-12
rs10426750	19	45457684	0.451292	G	C	-0.0427946	0.00601247	1.09787e-12
rs3760629	19	45458146	0.451292	A	C	-0.0430286	0.00601255	8.27796e-13
rs117316645	19	45458212	0.0397614	G	A	-0.146527	0.0145594	7.9643e-24
rs41334244	19	45458235	0.0397614	A	G	-0.141609	0.0141434	1.34477e-23
rs8102895	19	45458463	0.0159046	A	G	0.193619	0.0311881	5.3623e-10
rs143674704	19	45458466	0.0258449	A	G	-0.184601	0.025952	1.13419e-12
rs2238682	19	45458593	0.291252	C	T	-0.0372025	0.00670606	2.89632e-08
rs7252480	19	45458925	0.291252	C	T	-0.0368735	0.00670614	3.83087e-08
rs2239375	19	45459851	0.45328	T	C	-0.0430207	0.00601293	8.38642e-13
rs75178253	19	45461007	0.0715706	A	G	0.119691	0.0144509	1.20566e-16
rs204906	19	45461980	0.0248509	C	T	0.117822	0.0192124	8.64592e-10
rs204907	19	45461996	0.0467197	A	G	0.0905553	0.0150076	1.59996e-09
rs61062133	19	45463256	0.0397614	C	G	-0.141427	0.014167	1.81282e-23
rs204910	19	45463385	0.0248509	C	T	0.117671	0.0192564	9.91754e-10
rs204911	19	45463540	0.0248509	T	A	0.117796	0.0192212	8.87388e-10
rs8100120	19	45466058	0.452286	T	C	-0.0405498	0.00608573	2.68121e-11
rs8100236	19	45466144	0.452286	T	C	-0.0428041	0.0060384	1.3543e-12
rs204912	19	45466207	0.0377734	G	A	0.0858408	0.0154668	2.85642e-08
rs111997200	19	45466325	0.452286	T	C	-0.042621	0.00615392	4.33419e-12
rs204914	19	45466335	0.0367793	C	T	0.0878922	0.015884	3.14124e-08
rs147901416	19	45466792	0.170974	C	A	-0.0799029	0.00834837	1.05797e-21
rs145639166	19	45469129	0.0407555	A	G	0.135523	0.0202046	1.97905e-11
rs11878597	19	45470298	0.44334	T	C	-0.0427196	0.0060873	2.25353e-12
rs16979586	19	45471742	0.0397614	A	G	-0.142246	0.0142151	1.42518e-23
rs59136988	19	45472261	0.0397614	T	A	-0.136688	0.0138753	6.77528e-23
rs56834222	19	45472649	0.0397614	C	T	-0.136758	0.0138753	6.44306e-23
rs16979588	19	45475938	0.0397614	T	C	-0.136664	0.0138479	5.67645e-23
rs73558179	19	45476504	0.0407555	T	G	-0.129758	0.0137571	4.02188e-21
rs2293755	19	45476657	0.0407555	C	G	-0.129642	0.0137608	4.46416e-21
rs16979595	19	45477381	0.182903	G	A	-0.0756248	0.00800958	3.66461e-21
rs73558188	19	45480174	0.0397614	G	A	-0.135883	0.0139008	1.43892e-22
rs73558190	19	45481985	0.0397614	A	G	-0.136678	0.0138735	6.73596e-23
rs204477	19	45482201	0.04175	A	G	-0.0876495	0.0155594	1.7689e-08
rs8111069	19	45483438	0.340954	A	C	-0.0604155	0.00636754	2.35428e-21
rs145729706	19	45483721	0.0218688	G	A	-0.169733	0.0255922	3.30658e-11
rs73558194	19	45483844	0.0397614	G	A	-0.137126	0.0138975	5.79128e-23
rs73558195	19	45485491	0.0397614	G	A	-0.137012	0.013974	1.07353e-22
rs57270598	19	45486148	0.0397614	G	A	-0.137827	0.0139235	4.20791e-23
rs143668237	19	45486687	0.0397614	G	C	-0.141673	0.0144312	9.49795e-23
rs112417029	19	45486730	0.0397614	C	T	-0.137062	0.0139236	7.28248e-23
rs111869796	19	45486947	0.0397614	C	T	-0.137061	0.0139236	7.29067e-23
rs204474	19	45487178	0.369781	C	T	0.0376059	0.00628641	2.2028e-09
rs16979600	19	45487420	0.0397614	A	C	-0.137877	0.0138755	2.88167e-23
rs73558200	19	45487670	0.0397614	A	T	-0.137187	0.0139234	6.65554e-23
rs112329279	19	45488093	0.0417495	C	T	-0.140546	0.0143886	1.54644e-22
rs34112623	19	45489950	0.0397614	C	T	-0.137523	0.0139237	5.24439e-23
rs11672748	19	45490192	0.340954	A	G	-0.0595259	0.00639196	1.2472e-20
rs7257610	19	45490428	0.0397614	G	A	-0.14235	0.0142624	1.85026e-23
rs3786505	19	45490570	0.340954	A	G	-0.0595649	0.00639211	1.18001e-20
rs204468	19	45490636	0.373757	T	C	0.0449739	0.00624673	6.03949e-13
rs117261169	19	45491032	0.0109344	C	T	0.200734	0.0268024	6.91811e-14
rs204467	19	45491174	0.373757	A	G	0.0443372	0.006247	1.2717e-12
rs909134	19	45493061	0.340954	T	C	-0.0595845	0.00641711	1.61326e-20
rs2075619	19	45495682	0.340954	A	G	-0.0604942	0.00641706	4.2161e-21
rs57204168	19	45496776	0.340954	A	G	-0.0611526	0.00644063	2.20593e-21
rs60461903	19	45497577	0.0397614	T	C	-0.143373	0.0144113	2.55656e-23
rs73560223	19	45498622	0.0397614	A	G	-0.145018	0.0147093	6.27257e-23
rs56784978	19	45499388	0.33996	T	C	-0.0617334	0.00646612	1.33237e-21
rs12459272	19	45499922	0.0477137	T	C	0.0837523	0.0151501	3.23578e-08
rs148851376	19	45500494	0.0397614	C	T	-0.142806	0.0145791	1.17997e-22
rs2376866	19	45500712	0.170974	C	T	-0.0835513	0.00848246	6.86189e-23
rs71352248	19	45502503	0.0477137	A	C	0.083386	0.0152766	4.80359e-08
rs35577563	19	45504349	0.382704	C	G	-0.0416274	0.00635667	5.80741e-11
rs117612135	19	45504527	0.0139165	C	T	-0.342178	0.0281644	5.78479e-34
rs35194062	19	45505177	0.0526839	C	A	-0.112792	0.0149417	4.39243e-14
rs35255921	19	45507542	0.0139165	G	A	-0.302882	0.0255832	2.45137e-32
rs34800911	19	45507671	0.0139165	A	G	-0.280218	0.0241465	3.89143e-31
rs10423543	19	45508272	0.0467197	A	C	0.0844437	0.0154836	4.93163e-08
rs874743	19	45513236	0.0248509	G	A	-0.238826	0.0224538	2.0195e-26
rs874744	19	45513417	0.0238569	C	T	-0.241147	0.0227025	2.3539e-26
rs28809016	19	45514472	0.0238569	G	A	-0.243565	0.0227266	8.45375e-27
rs9749077	19	45514701	0.45328	T	G	0.0370626	0.00648517	1.09713e-08
rs35194383	19	45516050	0.434394	T	C	0.0480626	0.00644141	8.55396e-14
rs11668285	19	45516469	0.45328	G	A	0.0358249	0.00650144	3.58202e-08
rs34874378	19	45516881	0.0666004	G	A	-0.148814	0.0145749	1.78416e-24
rs116518981	19	45517497	0.0666004	G	A	-0.148185	0.0144889	1.49385e-24
rs56394437	19	45519264	0.454274	A	T	0.0368208	0.00648786	1.38415e-08
rs35912475	19	45522732	0.45825	C	T	0.0392938	0.00644426	1.07751e-09
rs112380717	19	45523061	0.0188867	G	C	-0.280905	0.0265211	3.25476e-26
rs28697575	19	45523127	0.0685885	G	T	-0.130135	0.0142834	8.17217e-20
rs4803791	19	45523583	0.257455	G	A	-0.0482848	0.00777904	5.39938e-10
rs114248186	19	45524119	0.0188867	C	T	-0.246342	0.0244994	8.73158e-24
rs142380271	19	45525038	0.0119284	A	G	-0.222086	0.033102	1.95757e-11
rs34827707	19	45541782	0.0228628	G	A	0.153917	0.0216578	1.1879e-12
rs76856627	19	45543755	0.0308151	A	G	-0.140373	0.0200687	2.66006e-12
rs112481437	19	45549135	0.0228628	G	A	-0.247782	0.0203132	3.18293e-34
rs147188206	19	45552587	0.0109344	T	C	-0.317624	0.0321807	5.61549e-23
rs139995984	19	45574482	0.0129225	G	C	0.214035	0.0338343	2.5163e-10
rs60239918	19	45580372	0.0506958	C	T	-0.135605	0.01618	5.24619e-17
rs7251911	19	45582402	0.0785288	C	G	-0.0867411	0.0137736	3.02253e-10
rs8100183	19	45584692	0.187873	C	T	-0.0639784	0.00826972	1.02214e-14
rs10416500	19	45586498	0.0934394	G	C	-0.100372	0.0111745	2.65301e-19
rs139290129	19	45587406	0.106362	T	C	0.0533697	0.00930907	9.86164e-09
rs78620885	19	45591084	0.0328032	C	T	-0.13247	0.0205321	1.10491e-10
rs10426398	19	45591344	0.450298	C	T	-0.0333592	0.00605872	3.67138e-08
rs10426759	19	45591353	0.450298	G	A	-0.0332057	0.00605877	4.23903e-08
rs75918199	19	45591859	0.106362	A	G	0.0530019	0.00927818	1.11306e-08
rs59240271	19	45591983	0.109344	T	A	0.0564809	0.00917781	7.55183e-10
rs10420562	19	45592238	0.0914513	C	T	-0.103677	0.011126	1.18136e-20
rs9653111	19	45592475	0.109344	C	T	0.056616	0.00921381	8.01226e-10
rs138137383	19	45601601	0.0109344	G	C	-0.268224	0.0259418	4.67286e-25
rs12461065	19	45605308	0.484095	C	T	-0.0577944	0.00623785	1.94845e-20
rs7248421	19	45606125	0.107356	C	T	-0.132032	0.0101597	1.29474e-38
rs12462040	19	45612226	0.107356	C	T	-0.130794	0.0101596	6.31607e-38
rs34545713	19	45614601	0.107356	C	T	-0.131898	0.0101582	1.50028e-38
rs10405086	19	45627235	0.107356	C	T	-0.132859	0.0101082	1.85121e-39
rs145903417	19	45629104	0.0198807	A	G	-0.254473	0.0242268	8.29906e-26
rs17643262	19	45631816	0.107356	G	A	-0.133841	0.0101156	5.79986e-40
rs754366	19	45633686	0.107356	G	A	-0.133196	0.0101136	1.30604e-39
rs10408847	19	45634682	0.233598	G	C	-0.0505441	0.00715336	1.59719e-12
rs1114832	19	45636201	0.111332	C	T	-0.126452	0.00998442	9.25586e-37
rs1114831	19	45636319	0.107356	C	A	-0.132079	0.0101386	8.55674e-39
rs28620490	19	45638245	0.107356	C	T	-0.13179	0.010137	1.20937e-38
rs75463276	19	45638832	0.0139165	C	G	-0.190626	0.0252753	4.62795e-14
rs3925162	19	45639716	0.233598	A	G	-0.0493254	0.00715194	5.31911e-12
rs10425074	19	45640124	0.233598	A	G	-0.0488513	0.00715287	8.51459e-12
rs10401157	19	45642044	0.107356	G	A	-0.131637	0.0101361	1.45041e-38
rs10401823	19	45642545	0.107356	C	G	-0.131448	0.0101297	1.66351e-38
rs2041262	19	45643890	0.233598	T	C	-0.0484835	0.00715278	1.21624e-11
rs78273125	19	45644354	0.106362	A	T	-0.130164	0.0101313	8.85865e-38
rs78073763	19	45649838	0.101392	T	G	0.0739145	0.0122598	1.6495e-09
rs74846209	19	45650099	0.104374	G	T	-0.130322	0.0100951	3.98425e-38
rs1048699	19	45650386	0.105368	C	T	-0.130752	0.0100943	2.25597e-38
rs113321260	19	45651237	0.104374	G	A	-0.130864	0.0100994	2.12958e-38
rs1005451	19	45652079	0.235586	T	C	-0.047926	0.00715224	2.07239e-11
rs28469095	19	45655333	0.107356	T	C	-0.132526	0.0102018	1.38466e-38
rs10421247	19	45657486	0.494036	C	T	-0.03989	0.00634823	3.30757e-10
rs78541786	19	45659606	0.028827	G	A	-0.105963	0.0194258	4.90436e-08
rs10417602	19	45660639	0.0994036	C	T	-0.126891	0.0110807	2.30989e-30
rs149553138	19	45672478	0.0318091	G	A	0.136074	0.0221053	7.47359e-10
rs76971643	19	45673122	0.0447316	G	A	0.104926	0.0172817	1.26718e-09
rs28367893	19	45673701	0.0914513	G	A	-0.130581	0.0111093	6.72148e-32
rs150685845	19	45675180	0.0129225	A	G	-0.273464	0.0253985	4.93209e-27
rs78979751	19	45685068	0.0904573	T	C	-0.128722	0.0113026	4.75761e-30
rs10415850	19	45689892	0.115308	C	T	-0.12658	0.0100128	1.24012e-36
rs59678362	19	45689976	0.115308	A	T	-0.127342	0.0100441	7.79686e-37
rs59839536	19	45689977	0.115308	A	C	-0.127064	0.0100216	7.72905e-37
rs75858218	19	45690545	0.0934394	C	T	-0.123322	0.0111246	1.47541e-28
rs12462536	19	45690775	0.0944334	A	G	-0.123309	0.0110468	6.22275e-29
rs12460985	19	45690889	0.195825	T	C	-0.058598	0.00782408	6.9165e-14
rs12463049	19	45690950	0.148111	C	G	-0.0642885	0.00862723	9.2067e-14
rs12463106	19	45691040	0.149105	G	T	-0.0618347	0.00861629	7.1522e-13
rs62118471	19	45691049	0.027833	T	C	0.146717	0.0250116	4.46527e-09
rs12461027	19	45691126	0.111332	T	A	-0.063583	0.0095921	3.38676e-11
rs78144257	19	45691279	0.135189	C	T	-0.0629647	0.00921627	8.37917e-12
rs80012930	19	45691343	0.135189	T	C	-0.0641108	0.00921898	3.54527e-12
[truncated: 128 more rows]
